1 **TITLE**

2 Voltage-clamp fluorometry analysis of structural rearrangements of ATP-gated channel P2X2  
3 upon hyperpolarization

4

5 **AUTHORS**

6 Rizki Tsari Andriani<sup>1,2\*</sup>, Yoshihiro Kubo<sup>1,2\*</sup>

7

8 **AFFILIATIONS**

9 <sup>1</sup>Division of Biophysics and Neurobiology, National Institute for Physiological Sciences, Aichi,  
10 Japan

11 <sup>2</sup>Department of Physiological Sciences, The Graduate University for Advanced Studies, School  
12 of Life Science, Kanagawa, Japan

13

14

15 **\* For correspondence:**

16 [kiki@nips.ac.jp](mailto:kiki@nips.ac.jp) (RTA); [ykubo@nips.ac.jp](mailto:ykubo@nips.ac.jp) (YK)

17 **ABSTRACT**

18 The gating of the ATP-activated channel P2X2 has been shown to be dependent not only on  
19 [ATP] but also on membrane voltage, despite the absence of a canonical voltage-sensor domain.  
20 We aimed to investigate the structural rearrangements of the rat P2X2 during ATP- and voltage-  
21 dependent gating by voltage-clamp fluorometry technique. We observed fast and linearly  
22 voltage-dependent fluorescence intensity (F) changes at Ala337 and Ile341 in the TM2 domain,  
23 which could be due to the electrochromic effect, reflecting the presence of a converged electric  
24 field here. We also observed slow and voltage-dependent F changes at Ala337, which reflect  
25 the structural rearrangements. Furthermore, we identified that the interaction between Ala337  
26 in TM2 and Phe44 in TM1, located in close proximity in the ATP-bound open state, is critical  
27 for activation. Taken together, we propose that the voltage dependence of the interaction in the  
28 converged electric field underlies the voltage-dependent gating.

29 **MAIN TEXT**

30 **Introduction**

31 P2X2 is a member of the P2X receptor family, a ligand-gated cation channel which  
32 opens upon the binding of extracellular ATP (Brake et al., 1994; Valera et al., 1994). P2X  
33 receptors consist of 7 sub-classes (P2X1 – P2X7), in each of which subunits assemble to form  
34 trimeric homomers or heteromers (e.g. P2X2/P2X3) (Radford et al., 1997; North, 2002; L.-H.  
35 Jiang et al., 2003). Based on the solved crystal structures, P2X receptors are known to have a  
36 topology with two transmembrane (TM) domains (TM1 and TM2), a large extracellular ligand  
37 binding loop (ECD) where the ATP binding site is located, and intracellular N- and C- termini  
38 (Kawate et al., 2009; Hattori & Gouaux, 2012; Mansoor et al., 2016; McCarthy et al., 2019).

39 P2X2 is mainly distributed in smooth muscles, central nervous system (CNS), retina,  
40 chromaffin cells, and autonomic and sensory ganglia (Burnstock, 2003). Recent studies showed  
41 that P2X2 receptor expressed in hair cells and supporting cells has important roles in auditory  
42 transduction. A dominant negative polymorphism in human results in progressive hearing loss  
43 (Yan et al., 2013). Moreover, P2X2 in the cochlea is found to be involved in adaptation to  
44 elevated sound levels (Housley et al., 2013).

45 The P2X2 receptor has complex gating properties that consist of (1) the [ATP]-  
46 dependent gating, as well as (2) the voltage-dependent gating, in spite of the absence of a  
47 canonical voltage sensor domain, in clear contrast to typical voltage-gated ion channels, which  
48 have a voltage sensor domain (VSD) within their respective structures. In the presence of ATP,  
49 there is a gradual increase in the inward current upon hyperpolarization. The conductance –  
50 voltage relationship shifts toward depolarized potentials with an increase in [ATP]. Thus, the  
51 activation of the P2X2 channel is voltage-dependent as well as [ATP]-dependent (Nakazawa  
52 et al., 1997; Zhou & Hume, 1998; Nakazawa & Ohno, 2005; Fujiwara et al., 2009; Keceli &  
53 Kubo, 2009). Previous studies reported that this activation upon hyperpolarization is indeed

54 an intrinsic property of the channel (Nakazawa et al., 1997; Zhou & Hume, 1998; Fujiwara et  
55 al., 2009).

56 It is of interest to know why and how P2X2 has voltage-dependent gating despite the  
57 absence of a canonical VSD. Previous studies extensively investigated the roles of amino acid  
58 residues in TM1 and TM2 during ATP-dependent gating and permeation (Haines et al., 2001;  
59 Jiang et al., 2001; Li et al., 2004; Khakh & Egan, 2005; Cao et al., 2007; Samways et al., 2008;  
60 Cao et al., 2009). In contrast, information about amino acid residues, particularly in TM  
61 domains, which might play important roles during voltage-dependent gating is still limited. A  
62 previous study identified positively-charged amino acid residues in the ATP binding pocket  
63 (K69, K71, R290, and K308; *r*P2X2 numbering) and aromatic amino acid residues in TM1  
64 (Y43, F44, and Y47; *r*P2X2 numbering) which are critical for ATP- and voltage- dependent  
65 gating of P2X2 receptor (Keceli & Kubo, 2009). However, those residues were not the sole  
66 determinant of [ATP]- and voltage-dependent gating of the P2X2 receptor. The interpretation  
67 as to the mechanism is not yet straightforward, and thus, the key amino acid residue that has  
68 a major contribution to the voltage sensing mechanism in P2X2 receptor is yet to be discovered.

69 Moreover, the details of the structural rearrangements upon ATP binding in the pore  
70 region remain controversial, due to discrepancies between the *z*fP2X4 structural data and P2X  
71 experimental data (Kawate et al., 2009; Kracun et al., 2010; Li et al., 2010; Hattori & Gouaux,  
72 2012; Heymann et al., 2013; Habermacher et al., 2016), as well as between the solved crystal  
73 structures of TM domains of *z*fP2X4 and *h*P2X3. The comparison highlights longer TM  
74 domains and visualized cytoplasmic domain in *h*P2X3 (Kawate et al., 2009; Hattori & Gouaux,  
75 2012; Mansoor et al., 2016). The structural study of *h*P2X3 visualized a region called the  
76 cytoplasmic cap in the ATP-bound open state, and it was further confirmed by the *r*P2X7  
77 crystal structure (Mansoor et al., 2016; McCarthy et al., 2019). Thus, the present study aims  
78 at analyzing the structural rearrangements of the P2X2 receptor upon (1) ATP- and (2) voltage-

79 dependent gating, by voltage-clamp fluorometry (VCF) using a fluorescent unnatural amino  
80 acid (fUAA) as a probe.

81 The combination of fluorometry and voltage-clamp recording offers a powerful method  
82 to track down real time conformational changes within the ion channel structure (Mannuzzu et  
83 al., 1996; Cha & Bezanilla, 1997; Pless & Lynch, 2008; Nakajo & Kubo, 2014; Talwar & Lynch,  
84 2015). The use of fUAA as a probe made it possible to label any residues within the protein,  
85 including those at the lower TM and intracellular regions, which will not be accessible by  
86 conventional VCF fluorophores such as Alexa-488 maleimide (Kalstrup & Blunck, 2013;  
87 Sakata et al., 2016; Kalstrup & Blunck, 2018; Klippenstein et al., 2018). Moreover, a direct  
88 incorporation of the fUAA will increase the labelling efficiency and also prevent non-specific  
89 labelling (Kalstrup & Blunck, 2013; Sakata et al., 2016).

90 The fUAA used here, *3-(6-acetylnaphthalen-2-ylamino)-2-aminopropionic acid* (Anap),  
91 was incorporated into the *rP2X2* protein by using a non-sense suppression method where the  
92 tRNA Anap-CUA and tRNA-synthetase pair is used to introduce Anap at an amber nonsense  
93 codon mutation (Lee et al., 2009; Chatterjee et al., 2013; Klippenstein et al., 2018), as shown  
94 in **Fig. 1A**. By performing VCF recording using Anap as a fluorophore, we analyzed the  
95 structural dynamics of the P2X2 receptor undergoing complex gating. In the present study, we  
96 observed evidence of voltage-dependent conformational changes around the transmembrane  
97 regions. We also investigated the key amino acid residues in each TM region whose interaction  
98 might have major contributions to the ATP- and voltage-dependent gating of the P2X2 receptor.

99 **Results**

100 **Fluorescence signal changes of Anap-labeled P2X2 receptor evoked by ATP and voltage**

101 As the P2X2 receptor does not have a canonical voltage-sensing domain (VSD), we  
102 performed Anap scanning by introducing TAG mutations one at a time in all regions of the  
103 P2X2 receptor, including the cytoplasmic N-terminus (8 positions), TM1 (20 positions), ECD,  
104 where the ATP binding site is located (25 positions), TM2 (24 positions), and cytoplasmic C-  
105 terminus (19 positions) (**Fig. 1B, C**). The whole of TM1 and TM2 was scanned, as these are  
106 the transmembrane domains in which a non-canonical voltage sensor might be located.

107 From the total of 96 positions of Anap mutant scanning in the P2X2 receptor, many  
108 showed ATP-evoked fluorescence intensity changes (**Supplementary Table 1**). As major and  
109 overall structural movement occurs upon the binding of ATP during the channel's transition  
110 from closed to open state in the P2X receptor (Kawate et al., 2009; Hattori & Gouaux, 2012;  
111 Mansoor et al., 2016; McCarthy et al., 2019), the results go well with the expectation that ATP-  
112 evoked fluorescence change would be observed at many positions labeled by Anap.

113 In contrast, at only two positions located at TM2 domain, out of 96 scanning positions,  
114 could we detect Anap fluorescence intensity changes ( $\Delta F$ ) in response to voltage stimuli. The  
115 two positions are A337 ( $\Delta F/F=0.5\pm 0.2\%$  upon voltage change from +40 mV to -140 mV at 440  
116 nm, n=3, **Fig. 1D, E**) and I341 ( $\Delta F/F=0.3\pm 0.2\%$  upon voltage change from +40 mV to -140 mV  
117 at 440 nm, n=3, **Fig. 1D, F**). Although the Anap  $\Delta F$  were observed after the application of 10  
118  $\mu\text{M}$  ATP and voltage step pulses, there are two major concerns as follows: (1)  $\Delta F$  is close to  
119 the limit of detection because signal to noise ratio is low, making it hard to perform further  
120 analysis e.g. F-V relationship; (2) The incidence of fluorescence change detection is also low.  
121 Thus, at this point, further analysis to determine the structural rearrangements with which Anap  
122  $\Delta F$  is associated could not be performed.

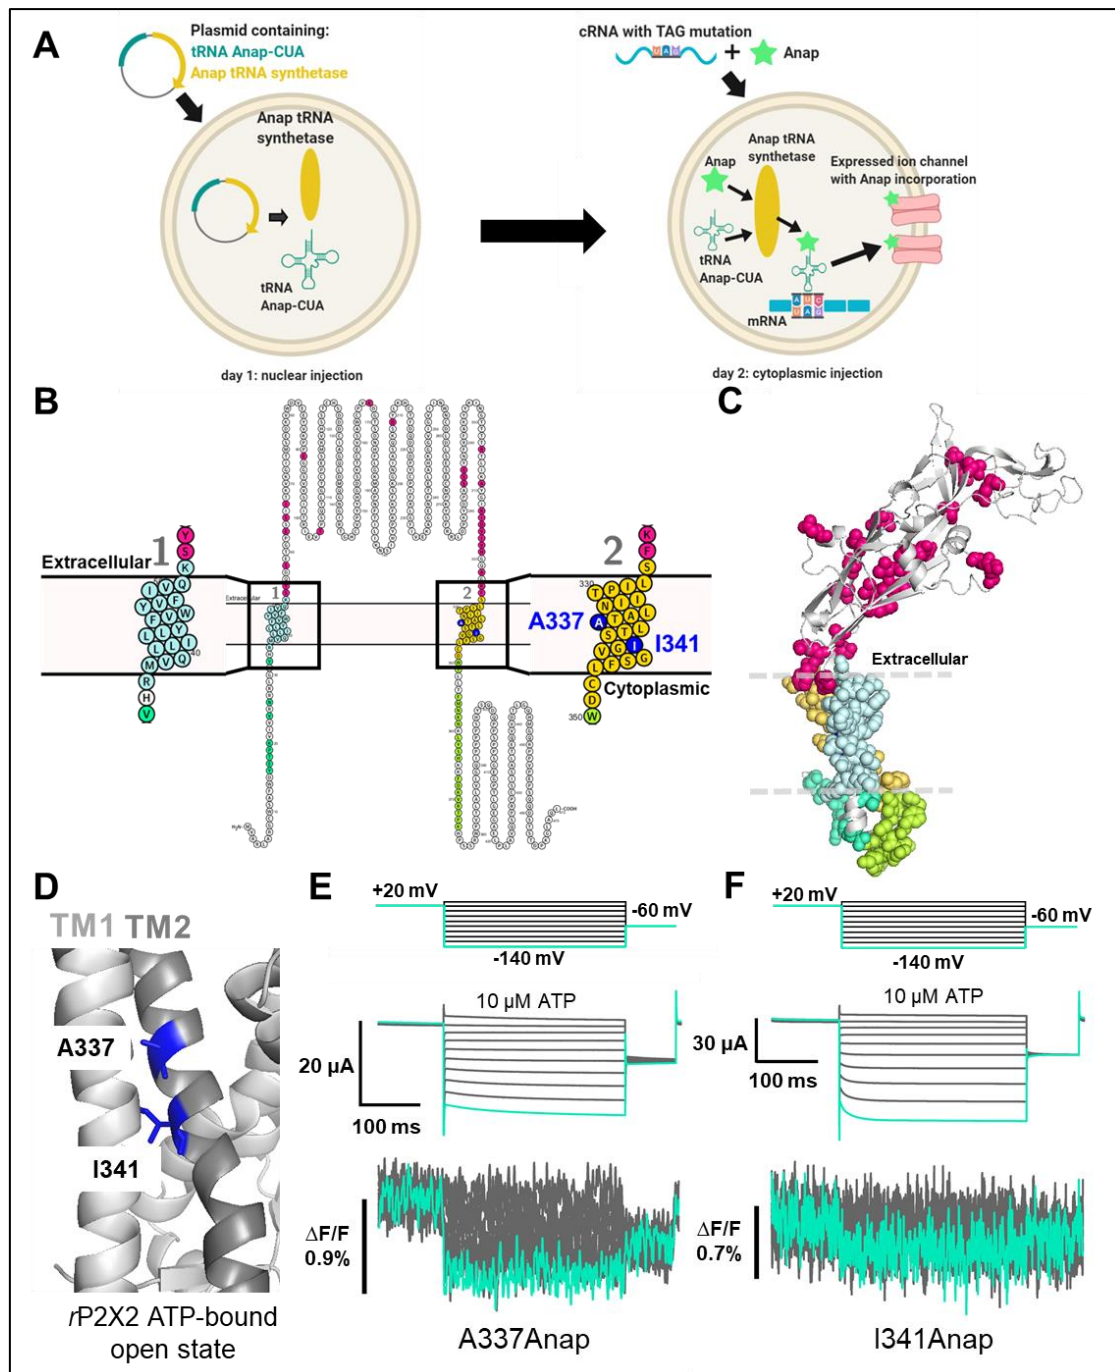

**Figure 1. Fluorescence signal changes of Anap incorporated P2X2 receptor evoked by ATP and voltage.** (A) A scheme depicting the principle of the direct incorporation of fUAA (Anap) into the ion channel protein. The plasmid containing tRNA Anap-CUA and tRNA synthase is injected into the nucleus of *Xenopus laevis* oocytes. On the following day, channel cRNA with TAG mutation is co-injected with Anap into the cytoplasmic region of the oocytes. Anap-incorporated channel protein was expressed successfully after the optimum incubation period. (B, C) A scheme to visualize the Anap scanning regions by individual amino acid residue representation (B) and within the protein structure (C), respectively. Anap mutant scanning was done by introducing TAG mutation one at a time in all regions of the P2X2 receptor (a total of 96 positions), which include the N-terminus (8 positions,

turquoise), TM2 (24 positions, yellow), extracellular domain (ECD, 25 positions, magenta), TM1 (20 positions, light blue), and C-terminus (19 positions, lime green). Voltage-dependent fluorescence changes of Anap were observed only at A337 and I341 in the TM2 domain (colored by dark blue). **(D)** The sites of the introduced TAG mutations, A337 and I341 in the TM2 domain, which gave voltage-evoked fluorescence changes. All of *rP2X2* structure representations in **(C)** and **(D)** were based on homology modeling from the ATP-bound open state *hP2X3* crystal structure data (PDB ID: 5SVK; Mansoor et al., 2016). **(E, F)** Representative current traces and fluorescence signal upon ATP and voltage application in Anap mutants (A337:  $\Delta F/F=0.5\pm 0.2\%$  at 440 nm, n=3; I341:  $\Delta F/F=0.3\pm 0.2\%$  at 440 nm, n=3; respectively). **(Source Data 1 Figure 1)**

## 123 **SIK inhibitor treatment improved VCF optical signal in Anap labeled *Ci*-VSP and P2X2** 124 **receptor**

125 To overcome the problems of only small fluorescence changes and low incidence of  
126 successful detection of fluorescence changes, a small molecule kinase inhibitor, namely an SIK  
127 inhibitor (HG-9-91-01), was applied by injection into the oocytes, to decrease the intrinsic  
128 background fluorescence (Lee & Bezanilla, 2019). This inhibitor promotes UV-independent  
129 skin pigmentation, by increasing the production of melanin (Mujahid et al., 2017), resulting in  
130 a darker surface of the animal pole of the oocyte. As the intrinsic background fluorescence of  
131 the oocytes is decreased, the percentage of fluorescence change ( $\Delta F/F$ ) is expected to increase.

132 Optimization of SIK inhibitor treatment in VCF experiments using Anap as fluorophore  
133 was achieved for the following conditions. (1) The optimal concentration of SIK inhibitor  
134 injected into the oocyte to give the maximum effect of decreasing the intrinsic background  
135 fluorescence. (2) The optimal injection conditions for the location of the microinjection into the  
136 oocyte (nuclear or cytoplasmic) and the duration of incubation.

137 *Ci*-VSP F401Anap (Sakata et al., 2016), was used as a positive control to obtain  
138 reproducible and distinct results **(Fig. 2A – E)**. Oocytes were pre-treated with two  
139 concentrations of SIK inhibitor (30 nM and 300 nM, reflecting the concentration of injected  
140 solution). 300 nM SIK application increased  $\Delta F/F$  more than twice that of non-treated oocytes,



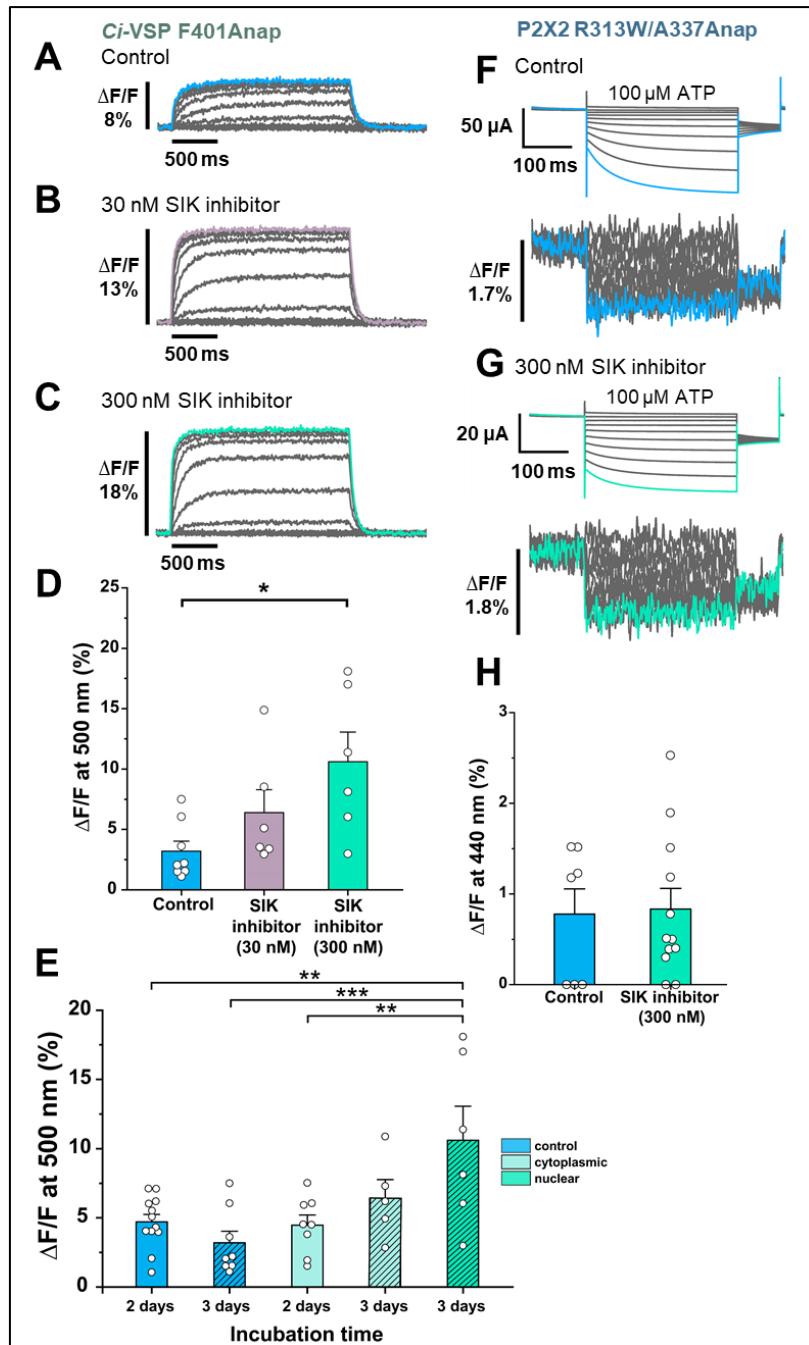

**Figure 2. Effect of SIK inhibitor treatment in Anap incorporated *Ci-VSP* and P2X2 receptor.**

SIK inhibitor treatment improved the VCF optical signal. (A - C) Representative fluorescence signal of VCF recordings of *Ci-VSP* without SIK inhibitor treatment, with 30nM, and with 300 nM SIK inhibitor treatment ( $\Delta F/F = 3.2\% \pm 0.8$  at 500 nm, n=8;  $\Delta F/F = 6.4\% \pm 1.9$  at 500 nm, n=6; and  $\Delta F/F = 10.6\% \pm 2.5$  at 500 nm, n=6 respectively). (D) Comparison of non-treated (control) group (n=8), 30 nM (n=6), and 300 nM SIK inhibitor application (n=6); \*,  $p \leq 0.05$ ,  $p = 0.016$ , one-way ANOVA with Tukey's post-hoc test for 300 nM, compared to the control group. (E) Comparison of the incubation time and site of injection of SIK inhibitor treatment using 300 nM SIK inhibitor: control group, 2 days incubation (n=12), control group, 3 days incubation (n=8), SIK inhibitor treatment with cytoplasmic injection with 2 days

incubation (n=8), with cytoplasmic injection for 3 days (n=5), with nuclear injection for 3 days (n=6); \*\*,  $p \leq 0.01$ , \*\*\*,  $p \leq 0.001$ , one-way ANOVA with Tukey's post-hoc test. **(F, G)** Representative current traces and fluorescence signal of VCF recordings of P2X2 receptor (A337Anap/R313W) without SIK inhibitor treatment and with the application of 300 nM SIK inhibitor ( $\Delta F/F = 0.77\% \pm 0.3$  at 440 nm, n=7; and  $\Delta F/F = 0.83\% \pm 0.2$  at 440 nm, n=12, respectively). **(H)** A comparison of non-treated (control) group (n=7) and 300 nM SIK inhibitor application (n=12) ( $p = 0.881$ , two sample t-test for 300 nM compared to the control group). All error bars are  $\pm$  s.e.m centered on the mean. **(Source Data 1 Figure 2)**

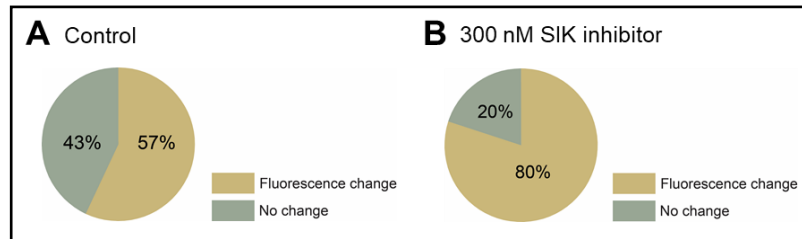

**Figure 2—figure supplement 1. Effect of 300 nM SIK inhibitor application on the incidence of detectable Anap fluorescence signal change of P2X2 receptor. (A, B)** Incidence of detectable changes of Anap fluorescence for control group (57%, n=7) and 300 nM SIK inhibitor application (80%, n=12), respectively. **(Source Data 1 Figure 2)**

141 whereas the application of 30 nM did not give a significant increase ( $\Delta F/F = 10.6\% \pm 2.5$  at 500  
142 nm, n=6;  $\Delta F/F = 3.2\% \pm 0.8$ , n=8; and  $\Delta F/F = 6.4\% \pm 1.9$ , n=6; respectively, **Fig. 2A – D**). This  
143 showed that 300 nM SIK inhibitor injected into the oocytes could decrease the intrinsic  
144 background fluorescence of the oocytes, thus increasing  $\Delta F/F$ .

145 Subsequently, a second series of optimization experiments was performed. In all of the  
146 following experiments, 300 nM SIK inhibitor was used. Control groups consisted of non-treated  
147 oocytes which were incubated for either 2 or 3 days, resulting in  $\Delta F/F = 4.7\% \pm 0.5$  (n=12) and  
148  $\Delta F/F = 3.2\% \pm 0.8$  (n=8), respectively. The nuclear injection group, which was incubated for 3  
149 days, had a larger  $\Delta F/F$  than the other groups ( $\Delta F/F = 10.6\% \pm 2.5$  at 500 nm, n=6). The  
150 cytoplasmic injection groups, which were incubated for either 2 or 3 days, resulted in  
151  $\Delta F/F = 4.5\% \pm 0.7$  (n=8) and  $\Delta F/F = 6.4\% \pm 1.3$  (n=5) respectively. These results suggest that the  
152 optimal conditions for SIK inhibitor treatment are nuclear injection with 300 nM SIK inhibitor  
153 and 3 days incubation (**Fig. 2E**).

154 After the optimal concentration, injection method, and incubation period were  
155 determined for the *Ci*-VSP experiment, the SIK inhibitor was then applied to the P2X2  
156 A337Anap/R313W mutant (**Fig. 2F, G**). R313W is a mutation which decreases the basal  
157 current in the absence of ATP, and the details are described later in **Fig. 4 and Fig. 4—figure**  
158 **supplement 1**. 300 nM SIK inhibitor treatment did not make any significant difference, in terms  
159 of the percentage of the fluorescence change compared to the control group ( $\Delta F/F = 0.77\% \pm 0.3$   
160 at 440 nm, n=7 and  $\Delta F/F = 0.83\% \pm 0.2$  at 440 nm, n=12, respectively, **Fig. 2H**). However, in the  
161 analysis of the incidence of detectable  $\Delta F$  of Anap, the group treated with 300 nM SIK inhibitor  
162 showed a higher incidence than the control group (control = 57%, n=7; 300 nM SIK inhibitor  
163 application = 80%, n=12; **Fig. 2—figure supplement 1. A, B**). These results showed that in  
164 the case of P2X2, SIK inhibitor treatment improved the incidence of detectable  $\Delta F/F$ . Therefore,  
165 we decided to use the SIK inhibitor in all of the following experiments.

### 166 **ATP- and voltage-evoked Anap fluorescence changes at A337 and I341 in TM2 exhibit a** 167 **fast kinetics and linear voltage-dependence**

168 By the application of 300 nM SIK inhibitor, a more frequent and improved signal-to-  
169 noise ratio of Anap  $\Delta F$  could be observed at A337 ( $\Delta F/F = 1.5\% \pm 0.2$  at 440 nm, n=8, **Fig. 3A**).  
170 VCF recordings were performed by the application of 10  $\mu$ M ATP and voltage step pulses from  
171 +40 mV to -140 mV with a holding potential at +20 mV. Fluorescence intensity change  
172 occurred almost instantaneously in less than 5 ms (**Fig. 3B**). This showed that the kinetics of  
173  $\Delta F/F$  are very rapid and faster than the time course of the voltage-dependent current activation.  
174 This also correlates well with the speed of the actual membrane potential change achieved by  
175 voltage clamp. Besides, the  $\Delta F/F - V$  relationship of A337Anap showed a linear voltage-  
176 dependence ( $y = 0.011x + 0.016$ ;  $R^2 = 0.99$ , n=8, **Fig. 3C**) in the recorded voltage range. These  
177 analyses of fluorescence changes at A337 indicated that the downward fluorescence change is

178 not associated with the protein conformational change. These changes are rather thought to be  
179 well explained as a phenomenon related to electrochromic effect.

180 Electrochromic effect is known as a shift in the fluorophore emission spectrum due to  
181 the interaction between two components: the fluorophore electronic state and the local electric  
182 field (Bublitz & Boxer, 1997; Klymchenko & Demchenko, 2002; Dekel et al., 2012). It has two  
183 distinctive characteristics: (1) fast kinetics of fluorescent change ( $\Delta F_{\text{Fast}}$ ); (2) linear voltage-  
184 dependence of the F-V relationship (Asamoah et al., 2003; Klymchenko et al., 2006). The  
185 electrochromic effect in some voltage-sensitive dyes is used to directly detect the change of  
186 membrane potential by attaching the dye to the cell membrane. If the fluorophore is directly  
187 attached in a site-specific manner within ion channels / receptors as shown by studies in the  
188 *Shaker* B  $K^+$  channel (Asamoah et al., 2003) and  $M_2$  muscarinic receptor (Dekel et al., 2012),  
189 the detection of electrochromic effect implies that there is a convergence of the electric field at  
190 the position where the fluorophore is attached. Thus, the observed fluorescence change at the  
191 position of A337 in the P2X2 receptor was explained to be due to the electrochromic effect,  
192 indicating that there is a focused electric field at A337 in the TM2 domain.

193 We noted that the G-V relationship for this mutant showed that a large fraction of the  
194 channel is already open, even at depolarized potentials, in 10  $\mu\text{M}$  ATP, compared to wildtype  
195 (**Fig. 3D**), because of the high density of the expressed channel shown by a rather large current  
196 amplitude ( $> 20 \mu\text{A}$ ). A previous study showed that P2X2 channel properties are correlated  
197 with expression density (Fujiwara & Kubo, 2004). In the case of lower expression levels,  
198 A337Anap showed a phenotype like wildtype. For the purpose of VCF experiments, however,  
199 a high expression level is needed to observe a detectable fluorescence change, and thus we  
200 needed to use oocytes with high expression, resulting in a lesser fraction of voltage-dependent  
201 activation. Nonetheless, we could still observe a weak voltage-dependent relaxation during

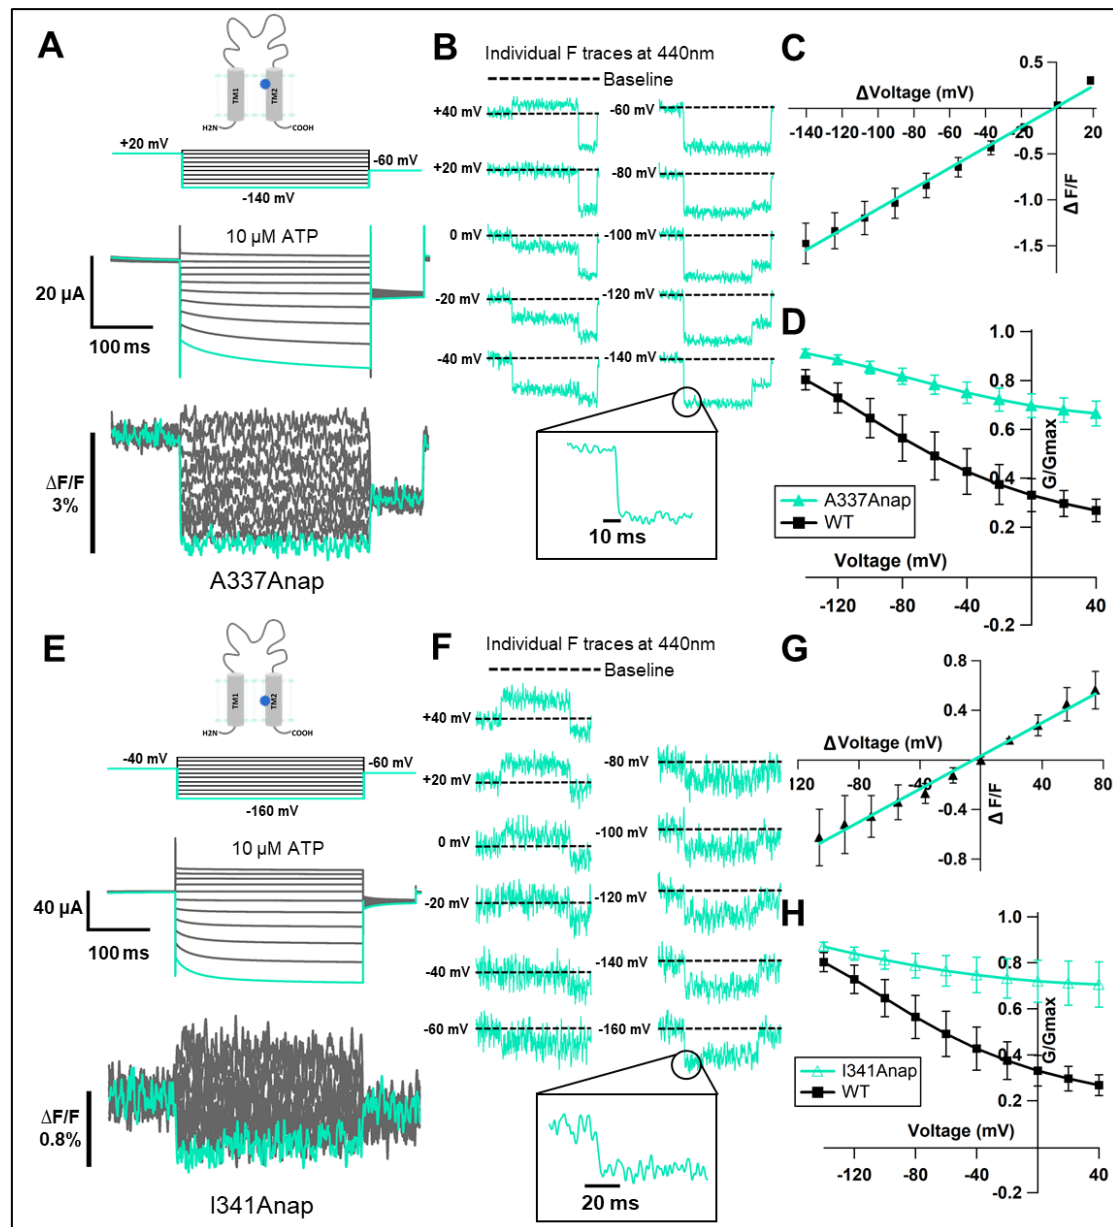

**Figure 3. Voltage-clamp fluorometry of Anap-incorporated P2X2 receptor in the presence of 300 nM SIK inhibitor upon ATP and voltage stimuli.**

The focused electric field converged at A337 and I341 in TM2, throughout P2X2 ATP- and voltage-dependent gating. (A) Representative current traces and fluorescence signal of VCF recordings at A337, with 300 nM SIK inhibitor treatment, in the presence of 10  $\mu$ M ATP ( $\Delta F/F = 1.5\% \pm 0.2$  at 440 nm,  $n=8$ ). (B) Individual fluorescence traces during each voltage step at 440 nm. Inset shows fluorescence changes exhibiting fast kinetics in ms range. (C) F-V relationship showed a linear voltage-dependence. Each X-axis for F-V relationship is  $\Delta V$  from the holding potential. (D) G-V relationship comparison between A337Anap (turquoise filled triangle) and wildtype (black filled square) for 10  $\mu$ M ATP ( $n=8$ ). Normalization was done based on the maximum conductance in the same concentration of ATP (10  $\mu$ M) for each construct. (E) Representative current traces and fluorescence signal of VCF recordings at I341, with 300 nM SIK inhibitor treatment, in the presence of 10  $\mu$ M ATP ( $\Delta F/F = 0.6\% \pm 0.2$  at 440 nm,  $n=3$ ).

(F) Individual fluorescence traces in each voltage step at 440 nm. Inset shows fluorescence changes also exhibiting fast kinetics in ms range. (G) F-V relationship showed a linear voltage-dependence. Each X-axis for F-V relationship is  $\Delta V$  from the holding potential. (H) G-V relationship comparison between I341Anap (turquoise open triangle) and wildtype (black filled square) for 10  $\mu\text{M}$  ATP (n=3). Normalization was done based on the maximum conductance in the same concentration of ATP (10  $\mu\text{M}$ ) for each construct. All error bars are  $\pm$  s.e.m centered on the mean. (Source Data 1 Figure 3)

202 hyperpolarization, and thus this fluorescence change still reflects an event occurring at or  
203 around the position of A337 when the receptor senses the change in membrane voltage.

204 Similarly, the application of 300 nM SIK inhibitor resulted in a clearer and more  
205 frequent Anap  $\Delta F/F$  at the position of I341 in the TM2 ( $\Delta F/F = 0.6\% \pm 0.2$  at 440 nm, n=3, **Fig.**  
206 **3E**) upon voltage step application in 10  $\mu\text{M}$  ATP. The fluorescence intensity changes also  
207 occurred almost instantaneously in less than 5 ms (**Fig. 3F**). The  $\Delta F/F - V$  relationship of  
208 I341Anap upon voltage step pulses in the presence of 10  $\mu\text{M}$  of ATP, from +40 mV to -160 mV  
209 with a holding potential at -40 mV, also showed a linear voltage-dependence ( $y = 0.007x +$   
210  $0.03$ ;  $R^2 = 0.99$ , n=3, **Fig. 3G**). Thus,  $\Delta F$  observed at the position of I341 in the TM2 domain  
211 also did not correlate with hyperpolarization-induced conformational change. The changes were  
212 thought to be due to a phenomenon similar to that observed at the position of A337, which is  
213 related to electrochromic effect. The G-V relationship of this mutant in the presence of 10  $\mu\text{M}$   
214 ATP was not different from that of A337Anap, as shown in **Fig. 3H**. Taking these results  
215 together, the observed fluorescence intensity changes at I341 and A337 in the TM2 domain is  
216 best explained by an electric field convergence close to both positions which could be critical  
217 for the complex gating of the P2X2 receptor.

218 **Fluorescence change of Anap at A337 upon voltage change was observed also in 0 ATP**  
219 **condition and was [ATP]-dependent**

220 To ensure that the fluorescence changes observed at A337 upon voltage change were  
221 not due to a change of ion flux, as in the case of the K2P  $\text{K}^+$  channel (Schewe et al., 2016),  
222 recording with the application of voltage step pulses was performed in the absence of ATP. In

223 the same cells, VCF recordings were performed by applying voltage step pulses in the absence  
224 of ATP and then in the presence of 10  $\mu$ M ATP.

225 When the voltage step pulses were applied in the absence of ATP, fluorescence changes  
226 were observed ( $\Delta F/F = 1.9\% \pm 0.4$  at 440 nm,  $n=4$ , **Fig. 4A – C**). The changes also exhibited fast  
227 kinetics and a linear voltage-dependence.  $\Delta F/F$  in the absence of ATP was larger than that in  
228 the presence of 10  $\mu$ M ATP ( $\Delta F/F = 0.7\% \pm 0.1$  at 440 nm,  $n=4$ , **Fig. 4A – C**). Thus, the focused  
229 electric field at the position of A337 is stronger in the absence of ATP than in the presence of  
230 10  $\mu$ M ATP.

231 However, the A337Anap mutant showed a high basal activity, even in the absence of  
232 ATP, when the expression level was high. As observed in the current traces in no ATP, some  
233 of the channels expressed were already open (**Fig. 4A**). Thus, the fluorescence changes in 0  
234 ATP observed in the above experiments might just represent the focused electric field in the  
235 open state. To record  $\Delta F$  in the closed state with little current in no ATP, an additional mutation  
236 was introduced which suppresses the basal activity by stabilizing the closed state.

237 The extracellular linker plays important roles in transmitting the signal from the ATP  
238 binding pocket (ECD domain) to the TM domains (Keceli & Kubo, 2014). A mutation of R313  
239 at the extracellular linker in  $\beta$ -14, which directly links the ATP binding site in the ECD domain  
240 with the TM2 domain to phenylalanine or tryptophan stabilized the closed state of the P2X2  
241 receptor, as seen in the G-V relationship in 100  $\mu$ M ATP (**Fig. 4 Supplementary Figure 2 A**  
242 – **D**). This mutation was introduced on top of A337Anap (A337Anap/R313F or  
243 A337Anap/R313W) to determine whether the focused electric field is present at the position of  
244 A337 even when the channel is mostly closed in 0 ATP.

245 Both results from VCF recording of A337Anap/R313F (**Fig. 4D – I**) and  
246 A337Anap/R313W (**Fig. 4—figure supplement 1 F – K**) confirmed that the focused electric  
247 field is present at A337 even when the channel is mostly closed. VCF recording in the absence

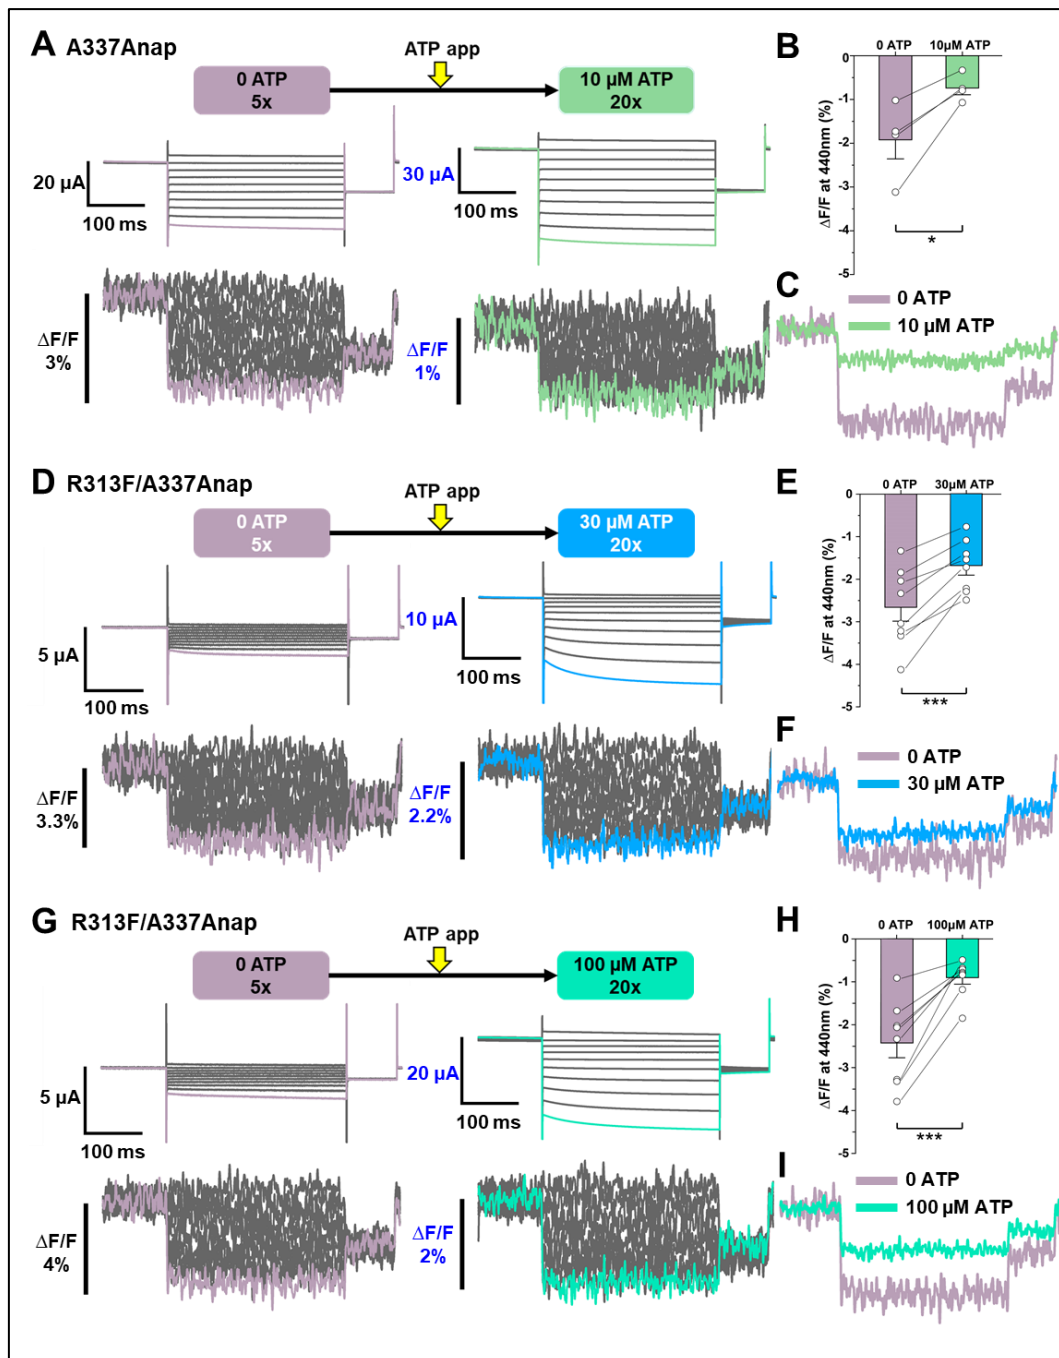

**Figure 4. Voltage-clamp fluorometry of Anap-labeled P2X2 at A337 in TM2 evoked by hyperpolarization in the absence and presence of ATP.**

Anap fluorescence changes at A337 were also observed even in the absence of ATP upon hyperpolarization. (A) Representative current traces and fluorescence signal of VCF recordings at A337 in the absence of ATP ( $\Delta F/F = 1.9\% \pm 0.4$  at 440 nm,  $n=4$ ) and in the presence of 10  $\mu\text{M}$  ATP ( $\Delta F/F = 0.7\% \pm 0.1$  at 440 nm,  $n=4$ ), from the same cell. (B) Comparison of the fluorescence changes in the absence and in the presence of 10  $\mu\text{M}$  ATP (\*  $p \leq 0.05$ ,  $p=0.029$ , paired t-test,  $n=4$ ) (C) Superimposed fluorescence traces at -140 mV, in 0 ATP (light purple) and 10  $\mu\text{M}$  ATP (light green), from the same cell. (D-I) An additional R313F mutation was introduced to lower the basal activity of A337Anap and



stabilize the closed state. **(D)** Representative current traces and fluorescence signal of VCF recordings of A337/R313F in the absence of ATP ( $\Delta F/F = 2.6\% \pm 0.3$  at 440 nm,  $n=8$ ) and in the presence of 30  $\mu\text{M}$  ATP ( $\Delta F/F = 1.7\% \pm 0.2$  at 440 nm,  $n=8$ ) from the same cell. **(E)** Comparison of the fluorescence changes in the absence and in the presence of 30  $\mu\text{M}$  ATP (\*\*\*,  $p \leq 0.001$ ,  $p = 0.00045$ , paired t-test,  $n=8$ ) **(F)** Superimposed fluorescence traces at -140 mV, in 0 ATP (light purple) and 30  $\mu\text{M}$  ATP (blue), from the same cell. **(G)** Representative current traces and fluorescence signal of VCF recordings of A337/R313F in the absence of ATP ( $\Delta F/F = 2.4\% \pm 0.3$  at 440 nm,  $n=8$ ) and in the presence of 100  $\mu\text{M}$  ATP ( $\Delta F/F = 0.9\% \pm 0.1$  at 440 nm,  $n=8$ ). **(H)** Comparison of the fluorescence changes in the absence and in the presence of 100  $\mu\text{M}$  ATP (\*\*\*,  $p \leq 0.001$ ,  $p = 0.0005$ , paired t-test,  $n=8$ ). **(I)** Superimposed fluorescence traces at -140 mV in 0 ATP (light purple) and 100  $\mu\text{M}$  ATP (turquoise), from the same cell. All error bars are  $\pm$  s.e.m centered on the mean. **(Source Data 1 Figure 4)**

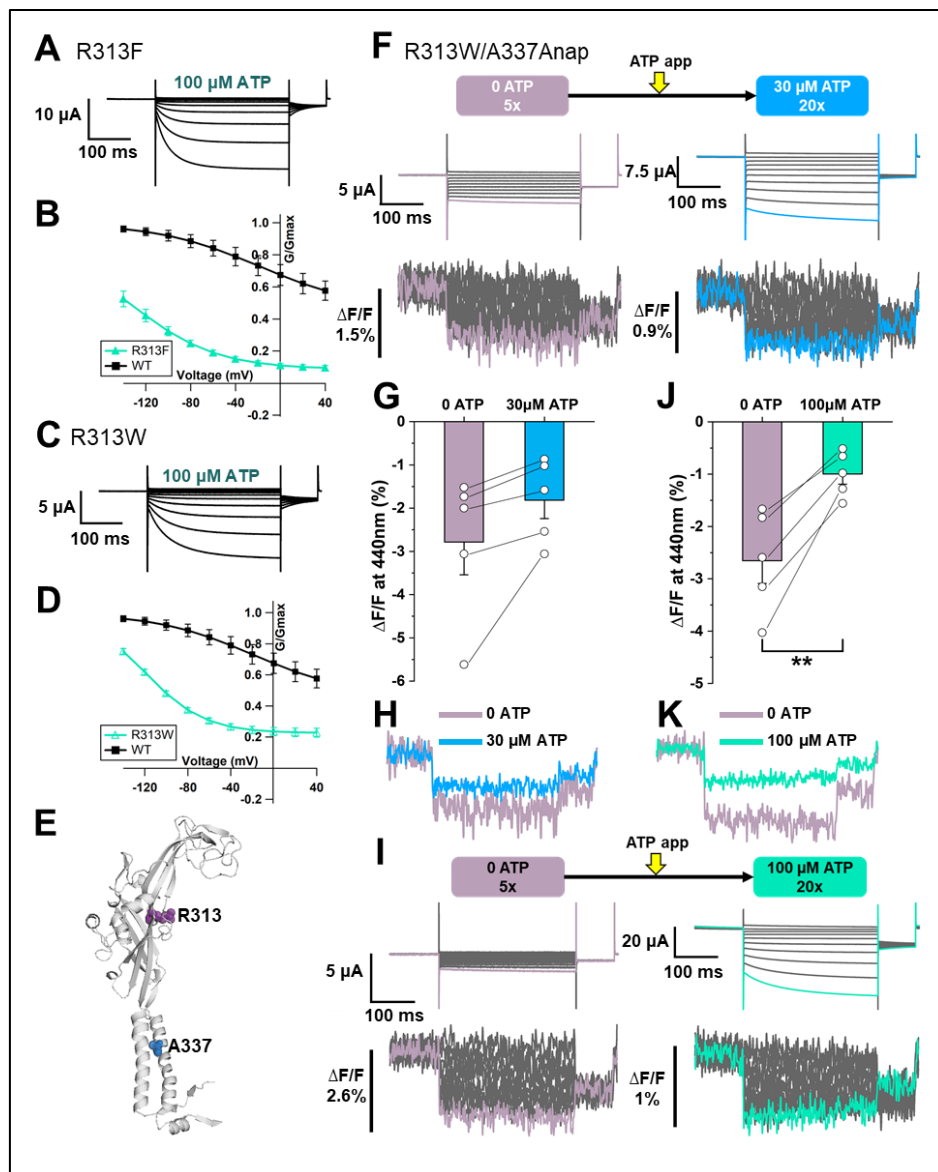

**Figure 4—figure supplement 1. Voltage-clamp fluorometry of Anap-labeled P2X2 at A337 in TM2 evoked by hyperpolarization in the absence and presence of ATP.** (A) Representative current traces of R313F upon application of 100  $\mu\text{M}$  ATP (B) Comparison of G-V relationships between R313F (turquoise filled triangle) and wildtype (black filled square) in 100  $\mu\text{M}$  ATP (n=3). (C) Representative current traces of R313W upon the application of 100  $\mu\text{M}$  ATP. (D) G-V relationship comparison between R313W (turquoise open triangle) and wildtype (black filled square) in 100  $\mu\text{M}$  ATP (n=3). Normalization was done based on the maximum conductance at the highest [ATP] (300  $\mu\text{M}$ ) for each construct. (E) Side view structural representation of the location of A337 (blue) and R313 (purple) in the ATP-bound open state (F) Representative current traces and fluorescence signal of VCF recordings of A337Anap/R313W in the absence of ATP ( $\Delta\text{F}/\text{F}= 2.8\%\pm 0.7$  at 440 nm, n=5) and 30  $\mu\text{M}$  ATP ( $\Delta\text{F}/\text{F}= 1.8\%\pm 0.4$  at 440 nm, n=5). (G) Comparison of the fluorescence changes in the absence and in the presence of 30  $\mu\text{M}$  ATP (p=0.072, paired t-test, n=5). (H) Superimposed fluorescence traces at -140 mV, in 0 ATP (light purple) and 30  $\mu\text{M}$  ATP (blue). (I) Representative current traces and fluorescence signal of VCF recordings of A337/R313W, in the absence of ATP ( $\Delta\text{F}/\text{F}= 2.6\%\pm 0.4$  at 440 nm, n=5) and in 100  $\mu\text{M}$  ATP ( $\Delta\text{F}/\text{F}= 0.9\%\pm 0.2$  at 440 nm, n=5) (J) Comparison of the fluorescence changes in the absence and in the presence of 100  $\mu\text{M}$  ATP (\*\* p $\leq$ 0.01, p=0.0049, paired t-test, n=5). (K) Superimposed fluorescence traces at -140 mV, in 0 ATP (light purple) and 100  $\mu\text{M}$  ATP (turquoise). All error bars are  $\pm$  s.e.m centered on the mean. (Source Data 1 Figure 4—figure supplement 1)

248 of ATP for A337Anap/R313F showed a remarkable  $\Delta\text{F}/\text{F}$  with mostly closed channels when  
249 voltage step pulses were applied ( $\Delta\text{F}/\text{F}= 2.6\%\pm 0.3$  at 440 nm, n=8; **Fig. 4D – F**). 30  $\mu\text{M}$  ATP  
250 application resulted in smaller  $\Delta\text{F}/\text{F}$  than in 0 ATP ( $\Delta\text{F}/\text{F}= 1.7\%\pm 0.2$  at 440 nm, n=8; **Fig. 4D**  
251 **– F**). These results confirmed that the focused electric field at the position of A337 is stronger  
252 in the absence of ATP than in the presence of ATP.

253 It is of interest to know whether or not the concentration of ATP affects the focused  
254 electric field at A337. Therefore, a higher concentration of ATP (100  $\mu\text{M}$ ) was tested for the  
255 same series of experiments. Fluorescence changes were again larger in the absence of ATP  
256 ( $\Delta\text{F}/\text{F}= 2.4\%\pm 0.3$  at 440 nm, n=8 **Fig. 4G – I**) and smaller in the presence of 100  $\mu\text{M}$  ATP  
257 ( $\Delta\text{F}/\text{F}= 0.9\%\pm 0.1$  at 440 nm, n=8 **Fig. 4G – I**).  $\Delta\text{F}/\text{F}$  was shown to become smaller with an  
258 increase in [ATP], by comparing  $\Delta\text{F}/\text{F}$  in the presence of 30  $\mu\text{M}$  and 100  $\mu\text{M}$  ATP.

259 Similar series of experiments were also performed using A337Anap/R313W construct  
260 (**Fig. 4—figure supplement 1 F – K**), and similar phenotypes were observed. Taken together,  
261 these results show that the focused electric field at A337 is [ATP]-dependent and stronger in  
262 the absence of ATP, suggesting that the rotation of TM1 upon ATP binding (**Fig. 8**) would  
263 tighten the space surrounding A337 making the electric field more converged.

264 **Hyperpolarization-induced structural rearrangements were detected at or around A337**  
265 **in TM2 upon the additional mutation of K308R**

266 Upon ATP binding, the P2X receptor undergoes major structural rearrangements which  
267 result in transitions from closed to open state, with remarkable alterations in the three regions:  
268 ATP binding site, extracellular linker, which links ECD to TM domains, and TM domains  
269 (Kawate et al., 2009; Hattori & Gouaux, 2012; Mansoor et al., 2016). There is a possibility that  
270 the P2X2 receptor could undergo relatively minor but important structural rearrangements in  
271 response to hyperpolarization of the membrane voltage after the overall structure is altered  
272 greatly by the binding of ATP. A fraction of a slow fluorescence intensity change and non-  
273 linear  $\Delta F/F - V$  could not be detected by the VCF experiments so far. This might be due to less  
274 clear voltage-dependent activation in high expression oocytes, with a significant activity even  
275 at depolarized potentials (e.g. **Fig. 3D, H**). Thus, an additional mutation which shows  
276 remarkable voltage-dependent activation, even in high expression conditions, is needed.

277 We then tested this possibility by introducing a K308R mutation on top of A337Anap.  
278 This charge-maintaining mutation, K308R, is shown to make the voltage-dependent activation  
279 more prominent, i.e. it is least active at depolarized potentials, even in high-expression oocytes,  
280 and it also accelerates the activation kinetics of P2X2 upon voltage stimuli (Keceli & Kubo,  
281 2009). K308 is a conserved residue located in the ATP binding site. It was shown to be not  
282 only important for ATP binding (Ennion et al., 2000; Jiang et al., 2000; Roberts et al., 2006)  
283 but also for the conformational change associated with channel opening (Cao et al., 2007). If

284 the voltage-dependent activation is more prominent even in high expression cells for VCF  
285 experiments, there is a possibility that we might be able to detect the fluorescence intensity  
286 change associated with the voltage-dependent gating.

287 VCF recording of K308R/A337Anap was performed in the presence of 300  $\mu$ M ATP,  
288 while a voltage-step from +40 mV to -160 mV, with a holding potential of +20 mV, was applied.  
289 A high concentration of ATP was applied because K308R/A337Anap has a lower sensitivity to  
290 ATP. Hyperpolarization elicited fluorescence signals which consist of two components, a very  
291 fast decrease ( $\Delta F_{\text{Fast}}/F$ ) and a slow increase ( $\Delta F_{\text{Slow}}/F$ ), until it reached the steady-state ( $\Delta F_{\text{Steady-}}$   
292  $\text{state}/F$ ) (**Fig. 5A, B**). Plots of the F-V relationship at the end of the recording time course (at the  
293 steady-state), showed that  $\Delta F/F - V$  consists of mixed components, a linear component and a  
294 non-linear component (**Fig. 5C**). The presence of the two components suggests that they might  
295 result from two different mechanisms. The F-V relationship of  $\Delta F_{\text{Fast}}/F$  showed a linear voltage-  
296 dependence, which is similar to the F-V for A337Anap alone, which was generated from the  
297 electrochromic signal (**Fig. 3C, Fig. 5D**). In contrast, the F-V relationship of  $\Delta F_{\text{Slow}}/F$  showed  
298 a non-linear voltage-dependence. The F-V and G-V relationships of the slow component  
299 overlap very well (**Fig. 5E**), showing that the slow F change reflects the hyperpolarization-  
300 induced structural rearrangements that occur at or around the position of A337.

301 Next, we examined whether  $\Delta F_{\text{Slow}}/F$  is indeed generated only at hyperpolarized  
302 potential to confirm that this is evidence of voltage-dependent structural rearrangements during  
303 P2X2 receptor complex gating. We performed VCF recordings by applying step pulses from  
304 up to +80 mV to -160 mV, with a holding potential of +20 mV. The F-V relationship in the  
305 steady-state showed a mixed signal. This set of recordings showed that at more depolarized  
306 potentials the fluorescence signal consists only of a linear component (**Fig. 5F - H**). Separation  
307 of the mixed fluorescence signal also resulted in a rapidly changing linear F-V for  $\Delta F_{\text{Fast}}/F$  (**Fig.**  
308 **5I**) and a non-linear F-V for  $\Delta F_{\text{Slow}}/F$  (**Fig. 5J**) with no slow component from +80 mV to 0 mV.

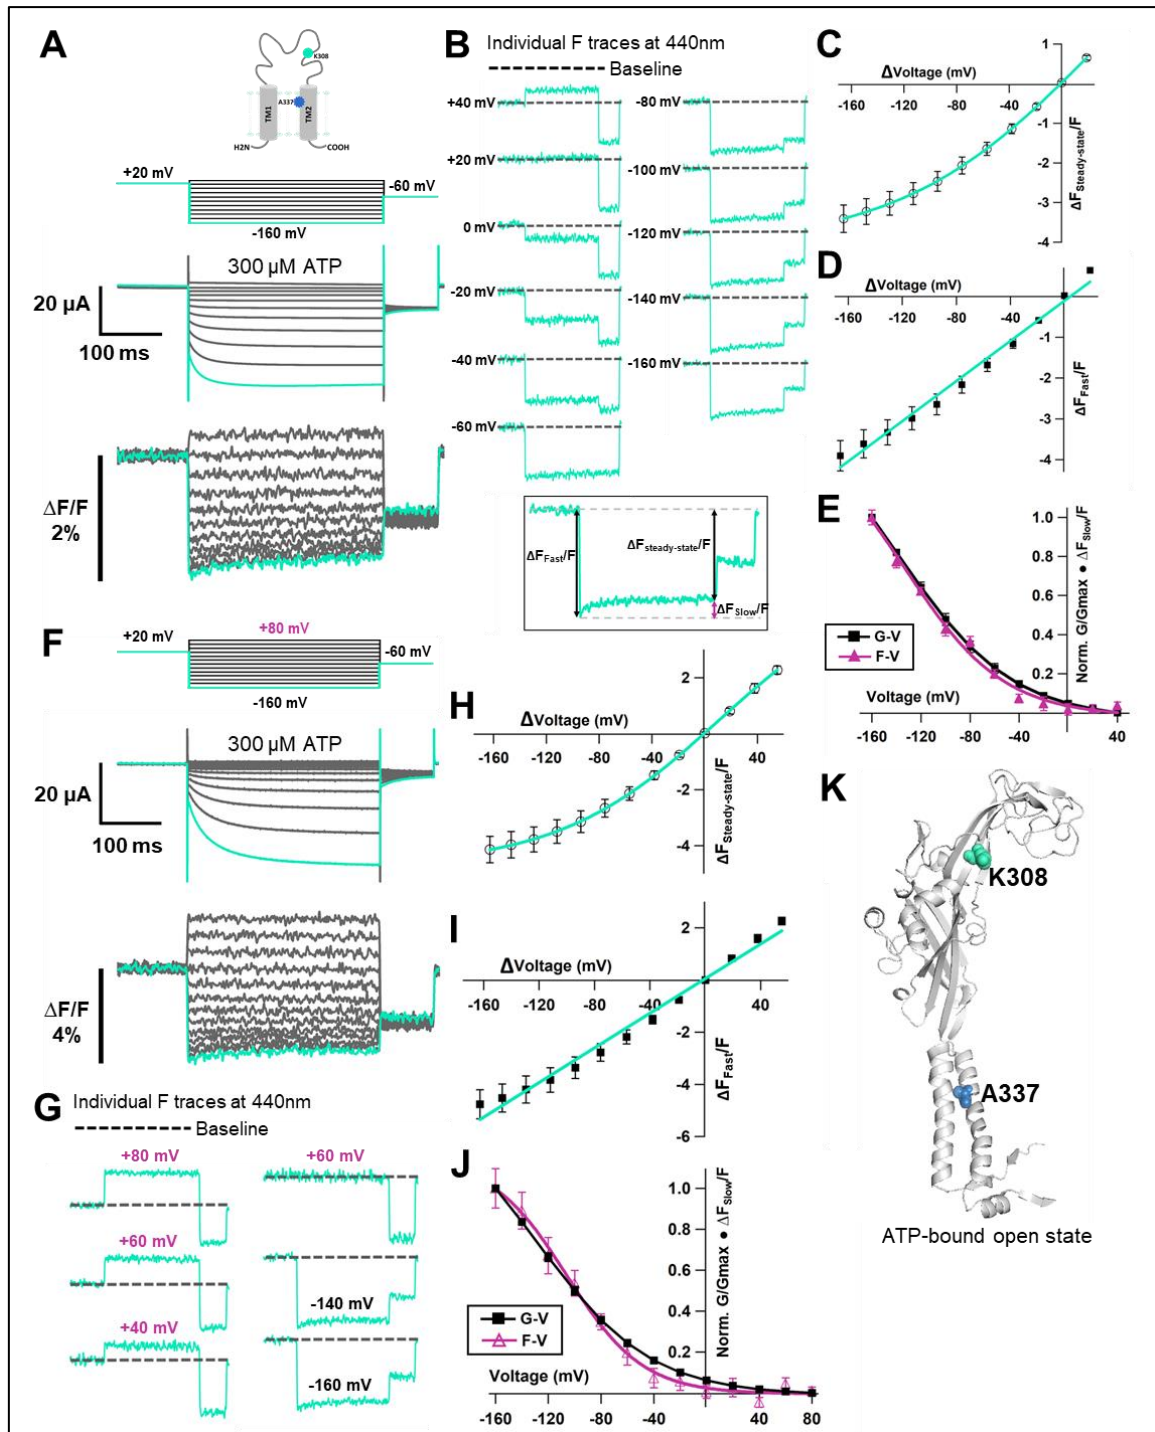

**Figure 5. Voltage-clamp fluorometry of Anap-labeled P2X2 at A337 in TM2 with the additional mutation of K308R evoked by hyperpolarization in the presence of ATP.** (A) Representative current traces and fluorescence signal of VCF recordings of K308R/A337Anap with 300 nM SIK inhibitor treatment in the presence of 300  $\mu$ M ATP, from +40 mV to -160 mV with a holding potential of +20 mV ( $\Delta F_{\text{Steady-state}}/F = 3.4\% \pm 0.3$  at 440 nm,  $n=8$ ). (B) Individual fluorescence traces at each voltage step. Inset shows that the fluorescence signal of K308R/A337Anap consists of two components, instantaneous downward change ( $\Delta F_{\text{Fast}}/F$ ) and slow upward change ( $\Delta F_{\text{Slow}}/F$ ). (C) F-V relationship of the mixed component ( $\Delta F_{\text{Steady-state}}/F$ ) was calculated from the last 50 ms of fluorescence signal.

Component of  $\Delta F_{\text{Steady-state}}/F$  is shown in inset of (B).  $F_{\text{Steady-state}} - V$  relationship shows that it consists of only a linear component at depolarized potentials, and there are mixed components at hyperpolarized potentials. (D)  $F_{\text{Fast}} - V$  relationship was taken from the first 5 ms of the fluorescence signal.  $F_{\text{Fast}} - V$  relationship showed almost linear voltage-dependence ( $\Delta F_{\text{Fast}}/F=3.9\% \pm 0.4$  at 440nm, n=8). (E) Comparison of  $F_{\text{Slow}} - V$  and G-V relationships. Purple filled triangle trace shows  $F_{\text{Slow}} - V$  relationship extracted from the fluorescence traces depicted in inset (B), as shown by purple arrow, from the equation  $\Delta F_{\text{steady-state}}/F = \Delta F_{\text{fast}}/F + \Delta F_{\text{slow}}/F$ . Normalization was done based on the maximum  $\Delta F_{\text{slow}}/F$  (at -160 mV). Black filled square trace shows G-V relationship in the presence of 300  $\mu\text{M}$  ATP. Normalization was done based on the maximum conductance in the same concentration of ATP (300  $\mu\text{M}$ ). (F) Representative current traces and fluorescence signal of VCF recordings of K308R/A337Anap with 300 nM SIK inhibitor treatment, in the presence of 300  $\mu\text{M}$  ATP, at more depolarized potentials from up to +80 mV to -160 mV, with a holding potential of +20 mV ( $\Delta F_{\text{steady-state}}/F=4.1\% \pm 0.5$  at 440 nm, n=5). (G) Individual fluorescence traces at each depolarized voltage step and some hyperpolarized voltage steps. (H)  $F_{\text{Steady-state}} - V$  relationship further confirms that it consists of a linear component and a slow component only generated upon hyperpolarization. (I)  $F_{\text{Fast}} - V$  relationship shows almost linear voltage-dependence ( $\Delta F_{\text{Fast}}/F=4.7\% \pm 0.5$  at 440nm, n=5). (J) Comparison of  $F_{\text{Slow}} - V$  and G-V relationships. Purple open triangle trace shows  $F_{\text{Slow}} - V$  relationship extracted from the fluorescence traces depicted in (F). Normalization was done based on the maximum  $\Delta F_{\text{slow}}/F$  (at -160 mV). Black filled square trace shows G-V relationship in the presence of 300  $\mu\text{M}$  ATP. Normalization was done based on the maximum conductance in the same concentration of ATP (300  $\mu\text{M}$ ). All error bars are  $\pm$  s.e.m centered on the mean. (K) Side view structure of the position of K308 and A337 in the ATP-bound open state. (Source Data 1 Figure 5)

309 The results further confirm that the slow rise in K308R/A337Anap fluorescence signal reflects  
310 the structural rearrangements at or around the position of A337 in response to the change in  
311 membrane voltage.

312 **Fluorescence signal changes at A337Anap/K308R exhibited only the fast component in**  
313 **the absence of ATP and showed two components in the presence of ATP**

314 We also examined whether the non-linear component of the K308R/A337Anap  
315 fluorescence signal was abolished in the absence of ATP. We then performed VCF recordings  
316 of the same cell by applying voltage steps in the absence of ATP and in the presence of 300  $\mu\text{M}$   
317 ATP. In the absence of ATP, the fluorescence signal consisted of only one component, the fast  
318 component ( $\Delta F_{\text{Fast}}/F$ , **Fig. 6A**). The F-V relationship for this fast component was linear and is

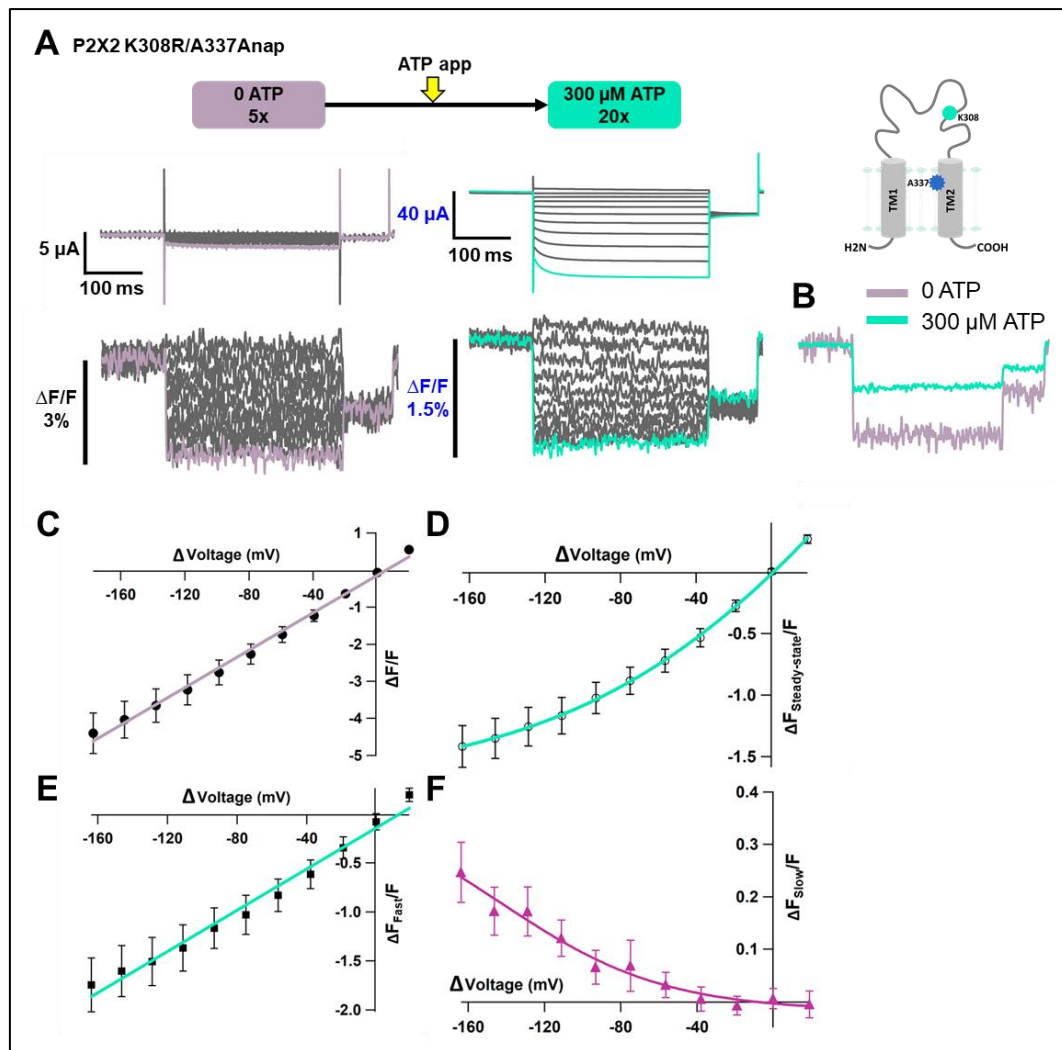

**Figure 6. Voltage-clamp fluorometry of Anap-labeled P2X2 at A337 in TM2 with the additional mutation of K308R evoked by hyperpolarization in the absence and presence of ATP.**

Fluorescence signal changes at K308R/A337Anap exhibited only a fast component in the absence of ATP and consisted of two components in the presence of ATP. **(A)** Representative current traces and fluorescence signal of VCF recordings of K308R/A337Anap in the absence of ATP ( $\Delta F/F = 4.4\% \pm 0.5$  at 440 nm,  $n=6$ ) and in the presence of 300  $\mu$ M ATP ( $\Delta F_{Steady-state}/F = 1.4\% \pm 0.2$  at 440 nm,  $n=6$ ), from the same cell. **(B)** Superimposed fluorescence traces at -160 mV in 0 ATP (light purple) and 300  $\mu$ M (turquoise). **(C)** F-V relationship, in the absence of ATP, taken from the last 100 ms of the fluorescence signals shows a linear voltage-dependence ( $R^2 = 0.99$ ); therefore, it has only the fast component ( $\Delta F_{Fast}/F$ ). **(D)** F-V relationship, in the presence of 300  $\mu$ M ATP, taken from the last 50 ms ( $\Delta F_{Steady-state}/F$ ) of the fluorescence signals shows mixed components. **(E-F)** F-V relationship from two separate components of the fluorescence signal change, in the presence of 300  $\mu$ M ATP. **(E)**  $F_{Fast} - V$  relationship ( $\Delta F_{Fast}/F = 1.7 \pm 0.3$  at 440nm,  $n=6$ ) shows almost linear voltage-dependence ( $R^2 = 0.98$ ). **(F)**  $F_{Slow} - V$  relationship ( $\Delta F_{Slow}/F = 0.25 \pm 0.05$  at 440nm,  $n=6$ ). Each X-axis for the F-V relationship is  $\Delta V$  from the holding potential. All error bars are  $\pm$  s.e.m centered on the mean. **(Source Data 1 Figure 6)**

319 thought to be derived from the electrochromic phenomenon, showing that A337 is located in  
320 the focused electric field (**Fig. 6C**).

321 Subsequently, when the voltage step pulses were applied in the presence of 300  $\mu\text{M}$   
322 ATP, the slow component could be observed (**Fig. 6A, D**). The F-V relationship in the steady-  
323 state showed a mixture of the two components (**Fig. 6D**). Separation of this mixed component  
324 resulted in a linear F-V for the fast component (**Fig. 6E**) and a non-linear F-V for the slow  
325 component (**Fig. 6F**), which is consistent with the previous experiments. Additionally,  
326 consistent results were also obtained in terms of the fluorescence intensity change of the fast  
327 component.  $\Delta F_{\text{Fast}}/F$  in the absence of ATP was larger than in the presence of ATP  
328 ( $\Delta F_{\text{Fast}}/F=4.4\%\pm 0.5$  at 440 nm, n=6 and  $\Delta F_{\text{Fast}}/F=1.7\%\pm 0.3$  at 440 nm, n=6; **Fig. 6B**). Taken  
329 together, these results further show that the slow component of the fluorescence intensity  
330 changes reflects the structural rearrangements of the P2X2 receptor upon complex gating which  
331 depends on both [ATP] and voltage.

### 332 **A337 in TM2 might interact with F44 in TM1 to stabilize the open state of the P2X2** 333 **receptor**

334 The electric field convergence at A337 and I341 and the voltage-dependent  
335 conformational changes at or around A337 could provide us with a clue to understand the  
336 mechanism of the complex gating of the P2X2 receptor. The existence of a strong electric field  
337 supports the possible location of a key residue which is responsible for the voltage sensing  
338 (Asamoah et al., 2003; Dekel et al., 2012). Thus, various single amino acid mutations were  
339 introduced at the position of A337, and their electrophysiological properties were analyzed,  
340 focusing on the [ATP]-dependent and voltage-dependent gating properties, to see whether or  
341 not this amino acid plays an important role in the P2X2 complex gating (**Fig. 7A – B**).

342 Mutations to A337R, A337K, and A337D had severe effects. When the voltage step  
343 pulses were applied in 30  $\mu\text{M}$  ATP, these mutants almost lacked voltage sensitivity. A337E,



344 A337Y, and A337F showed a voltage sensitivity with various activation kinetics. The most  
345 striking changes were observed in A337Y and A337F. The activation evoked by a voltage step  
346 was clearly different from wildtype, whereas the A337E mutation had a less severe effect (**Fig.**  
347 **7A**). G-V relationships in 30  $\mu$ M ATP for mutants and wildtype were analyzed (**Fig. 7B**).  
348 Normalization was done based on the maximum conductance at the highest ATP concentration  
349 (300  $\mu$ M) from each construct. Here we could also see that the mutants of A337Y and A337F  
350 preferred to stay in the closed state. As the activation kinetics and the voltage dependence were  
351 altered by the introduction of mutation at A337, this position was shown to be critical for the  
352 P2X2 receptor complex gating.

353         Next, we aimed to identify the counter-part in the TM1 domain with which A337 might  
354 have an interaction during the complex gating. Based on the homology modelling of *r*P2X2 in  
355 the closed and ATP-bound open states from *h*P2X3 crystal structure data (PDB ID: 5SVJ,  
356 5SVK, respectively) (Mansoor et al., 2016), F44 in the TM1 domain was shown to rotate and  
357 move towards A337 upon ATP binding (**Fig. 7C, D**). Various single amino acid mutations were  
358 then introduced at F44 and their [ATP]-dependent and voltage-dependent gating was analyzed  
359 (**Fig. 7E, F**).

360         The F44A mutation strikingly changed the gating. It showed a relatively high basal  
361 current in the absence of ATP and further responded to ATP application. Voltage-dependent  
362 gating was also changed, as seen in the lack of tail current, showing that this mutant might have  
363 a constitutive activity with rectified permeation properties. Mutation to positively charged  
364 residues (F44R, F44K) resulted in a non-functional channel and/or a very low expression level,  
365 as the recording on day 4 did not evoke any response to the highest concentration of ATP used  
366 in this study (300  $\mu$ M). Mutation to negatively charged residues (F44E, F44D) and aromatic  
367 residues (F44Y, F44W) remarkably changed the ATP-evoked response (**Fig. 7E**).

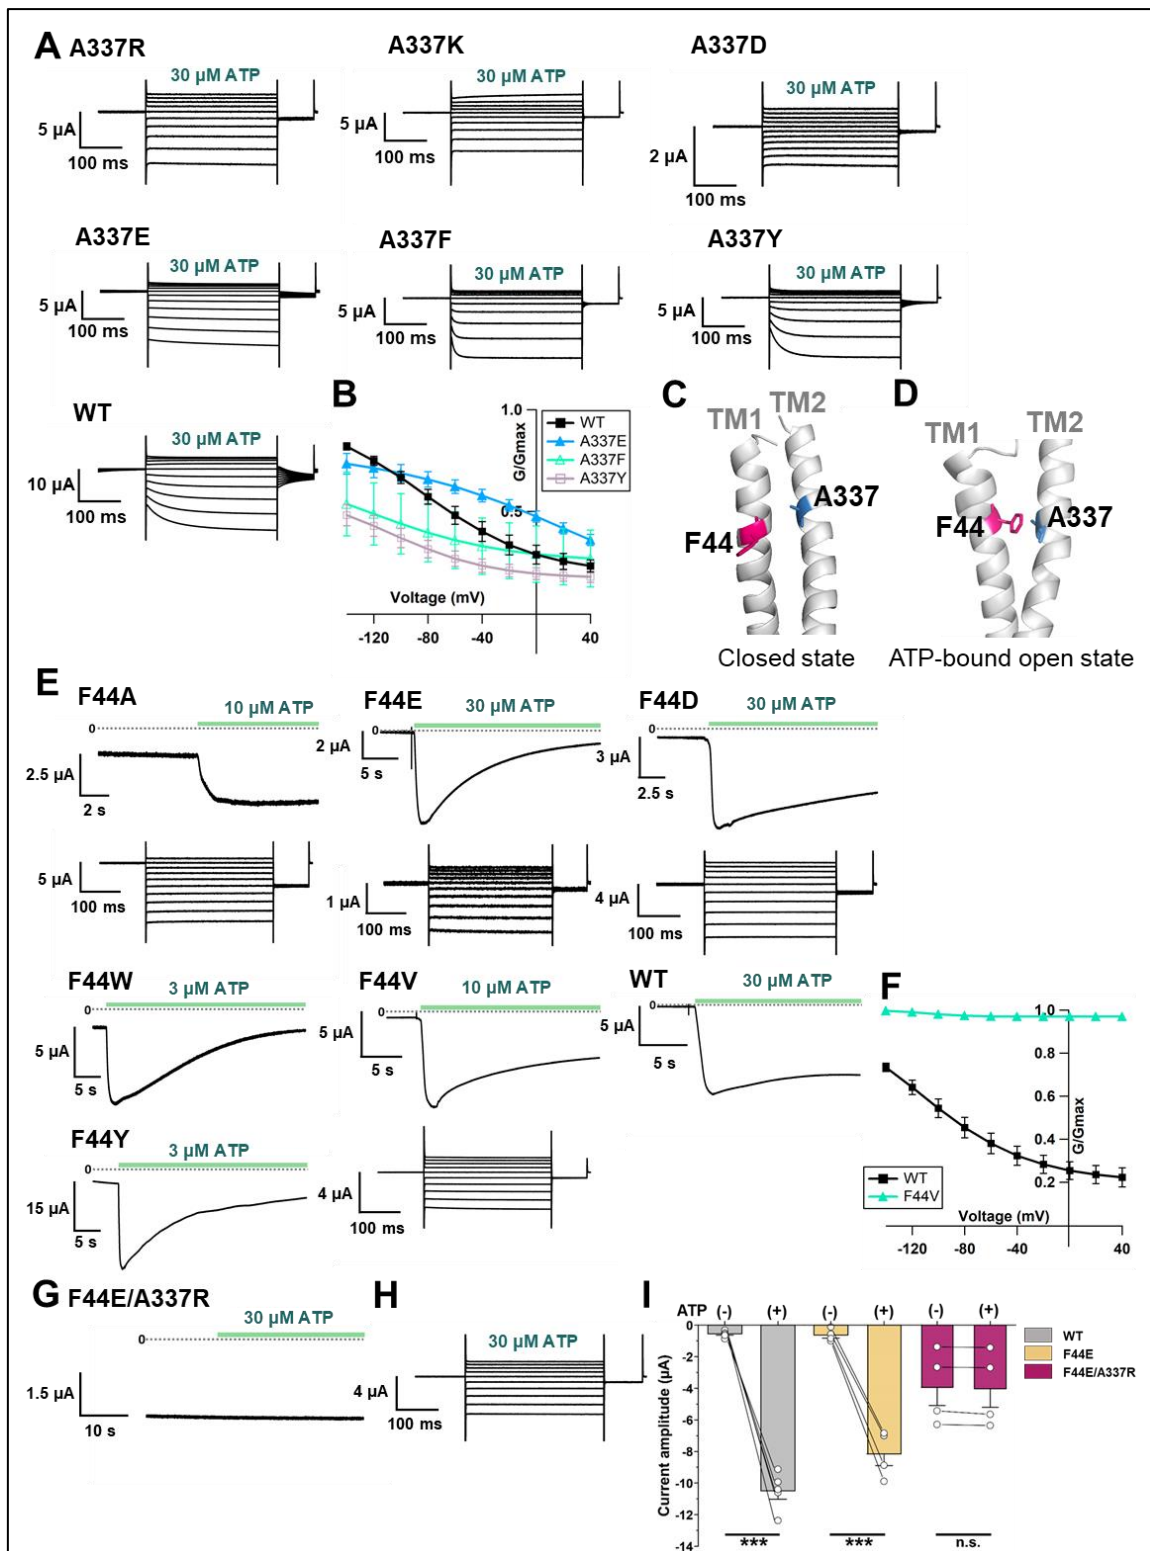

**Figure 7. Effects of mutations at A337 in TM2 and F44 in TM1 on P2X2 receptor ATP- and voltage-dependent gating.** (A) Representative current traces of single amino acid mutants at the position of A337 in the presence of 30  $\mu$ M ATP in response to voltage step pulses from +40 mV to -140 mV, with a holding potential of -40 mV (A337R, A337K, A337D, A337E, A337F, A337Y, and WT; respectively). (B) Comparison of G-V relationships between WT (black filled square), A337E (blue

filled triangle), A337F (turquoise open triangle), and A337Y (purple open square) for 30  $\mu$ M ATP (n=3), from tail current analysis at -60 mV. Normalization was done based on the maximum conductance in the highest [ATP] (300  $\mu$ M) for each construct. (C, D) Side view structure of the position of F44 (magenta) and A337 (blue) in the closed (C) and ATP-bound open (D) state, respectively. (E) Representative current traces of single amino acid mutants at the position of F44 upon application of various [ATP] (F44A, F44W, F44Y, F44E, F44D and WT; respectively; n=3-6 for each mutant). (F) G-V relationship comparison between WT (black filled square) and F44V (turquoise filled triangle) for 10  $\mu$ M ATP (n=3), showing that this mutant was equally active at all recorded voltages and was far less sensitive to voltage than wildtype. Normalization was done based on the maximum conductance in the highest [ATP] (300  $\mu$ M) for each construct. (G, H) Representative current traces of F44E/A337R upon ATP (G) and voltage (H) application. (I) Comparison of current amplitude of WT, F44E, and F44E/A337R before and after ATP application (\*\*\*)  $p \leq 0.001$ ,  $p = 0.00007$  for WT and  $p = 0.00095$  for F44E, paired t-test, n=4-5). All error bars are  $\pm$  s.e.m centered on the mean. (Source Data 1 Figure 7)

368 All four mutants still opened upon the application of ATP but current decay in the continuous  
369 presence of ATP appeared to be faster than wildtype.

370 F44 is conserved only in P2X2 and P2X3. Other subtypes of P2X receptor, like P2X1,  
371 P2X4, P2X6, and P2X7, except P2X5, have valine at the corresponding position (Kawate et al.,  
372 2009). Thus, the F44V mutation was also introduced. 10  $\mu$ M of ATP could activate F44V but  
373 resulted in faster current decay than wildtype. Voltage step pulses were applied during the  
374 course of current decay because there was no clear steady-state (Fig. 7E). Nonetheless, it could  
375 still be observed how the mutation at F44V changed the voltage-dependent gating. The G-V  
376 relationship of F44V in 10  $\mu$ M ATP showed that this mutant was far less sensitive to voltage  
377 than wildtype (Fig. 7F). Taken together, the results of the mutations introduced at position F44  
378 showed that this residue is critical for the proper ATP- and voltage-dependent gating of the  
379 P2X2 receptor.

380 Additionally, as the single amino acid mutations at both A337 and F44 altered the gating  
381 of P2X2, it is of interest to know whether the introduction of swapped mutations into A337/F44  
382 would rescue the wildtype phenotype. The phenotype of F44A/A337F was similar to F44A and  
383 the wildtype phenotype was not rescued (Fig. 7—figure supplement 1).

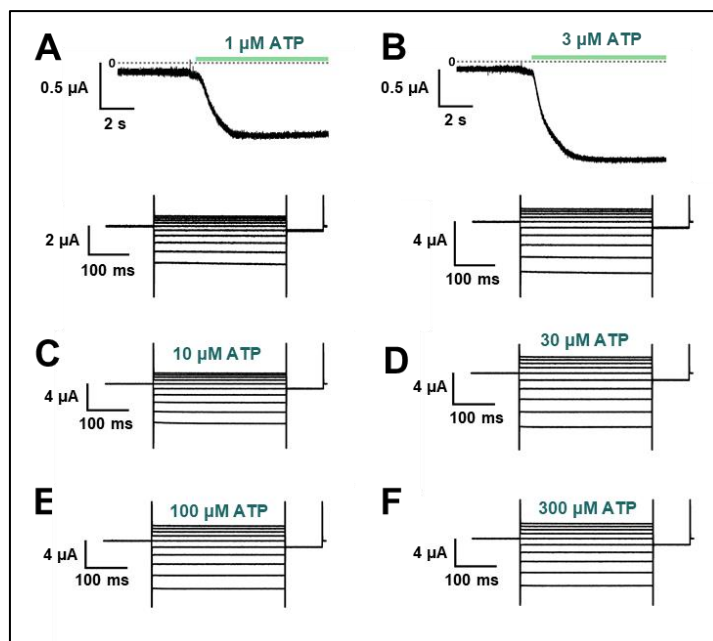

**Figure 7—figure supplement 1. The effect of swapped mutation F44A/A337F.** (A – F) Representative current traces of F44A/A337F upon various [ATP] application (1, 3, 10, 30, 100, 300 μM), followed by voltage application at each concentration (n=3). Voltage-dependent gating was almost absent, similarly to F44A (**Fig. 7E**).

384 It is possible that an interaction between A337 and F44 could not be properly formed in the  
385 swapped mutant.

386 Next, an artificial electrostatic bridge was introduced between A337 and F44 to prove  
387 that the interaction between the two residues is critical in the ATP-bound open state. Various  
388 paired electrostatically charged residues were introduced into A337 and F44, in order to see if  
389 the artificial electrostatic bridge could be formed. The F44E/A337R pair showed a constitutive  
390 activity. This double mutant was already open before ATP application and didn't show any  
391 response to ATP application (**Fig. 7G**). When voltage step pulses were applied, this mutant  
392 lacked sensitivity to voltage with a rectified permeation property, as seen by the total lack of  
393 tail currents (**Fig. 7H**). Additionally, the comparison of the current amplitude before and after  
394 ATP application showed that F44E/A337R is already open before ATP application (**Fig. 7I**).  
395 The results showed that A337 in the TM2 domain might interact with F44 in TM1 to stabilize  
396 the open state of the P2X2 receptor.

397 Based on the results from VCF recording, mutagenesis experiments, and the homology  
398 modeling of *rP2X2* in the open state upon ATP binding, it was shown that F44 moves into close  
399 proximity to the converged electric field at A337 and I341 (**Fig. 8B, C**). In the presence of ATP,  
400 voltage-dependent conformational changes occur possibly at or around the position of A337  
401 and F44, giving influence to the interaction between A337 and F44, which is critical for  
402 stabilizing the open state. Results of this study show that the origin of the voltage-dependent  
403 gating of P2X2 in the presence of ATP is possibly the voltage dependence of the interaction  
404 between A337 and F44 in the converged electric field.

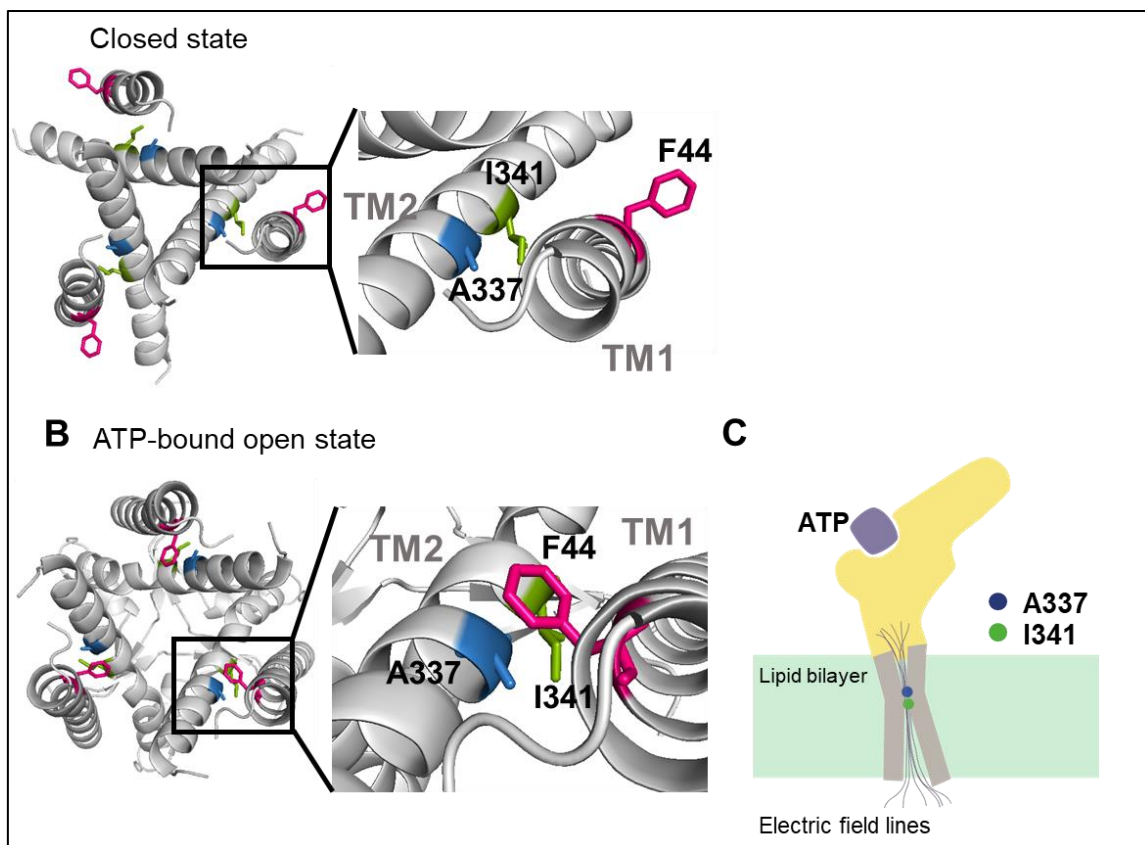

**Figure 8. Proposed initiation mechanisms of P2X2 receptor complex gating.** (A, B) Top view structure of P2X2 receptor in the closed (A) and ATP-bound open state (B). Depicted are the proposed initiation mechanisms of P2X2 receptor complex gating as follows. (1) The electric convergence at A337 and I341 (2) F44 moves towards A337 in TM2 domain upon ATP binding (3) Hyperpolarization-induced structural rearrangements around A337 in TM2 (4) The interaction between A337 and F44 in the ATP-bound open state is thought to be under the influence of the converged electric field. (C) A schematic illustration of the focused electric field at A337 and I341. Ion permeation pathway is not depicted in this scheme.

405 **Discussion**

406 The present study aims at defining the roles of the TM domains of the P2X2 receptor in  
407 the complex gating by [ATP] and voltage, using VCF with a genetically incorporated fUAA  
408 probe, named Anap, and a mutagenesis study. The following findings were obtained.

409 **Detection of fast F changes with a linear voltage-dependence at A337 and I341**

410 We analyzed 96 mutants by VCF and detected voltage-dependent  $\Delta F_{\text{Fast}}/F$  change at the  
411 position of A337 and I341 in TM2. It was very fast and showed a linear voltage-dependence in  
412 the recorded voltage range. The change could be well interpreted to be due to an electrochromic  
413 effect, indicating that there is an electric field convergence at both positions, which are located  
414 adjacent to each other.

415 An electrochromic signal is an intrinsic property exhibited by voltage-sensitive  
416 fluorescent dyes or electrochromic probes to directly detect transmembrane potentials (Loew,  
417 1982; Zhang et al., 1998). By standard use of electrochromic probes in a lipid bilayer, it is hard  
418 to sense the electrical potential that directly acts on the voltage-sensing machinery of membrane  
419 proteins (Asamoah et al., 2003). This is because the local electric field at a certain position in  
420 the lipid bilayer is not steep enough. On the other hand, previous VCF studies on the *Shaker* K<sup>+</sup>  
421 channel, using modified electrochromic probes (Asamoah et al., 2003), and on the M<sub>2</sub>  
422 muscarinic receptor, using TMRM (Dekel et al., 2012), showed that an electrochromic signal  
423 could also be observed when the fluorophore is directly attached to a specific position within  
424 the ion channel / receptor. These studies stated that this phenomenon did not report  
425 conformational changes of the protein at a specific position where the fluorophore was attached,  
426 but rather implied that there is an electric field convergence if the electrochromic signal is  
427 observed only at positions adjacent to each other (Asamoah et al., 2003; Dekel et al., 2012).  
428 This observed electrochromic signal might support the possible location of a voltage sensor

429 (Asamoah et al., 2003; Dekel et al., 2012). Further studies are certainly required to prove this  
430 possibility.

431 An almost linear F-V relationship which might originate from the electrochromic signal  
432 was also reported from VCF studies in a canonical VSD-containing membrane protein named  
433 hTMEM266 labeled with MTS-TAMRA. The observed  $\Delta F_{\text{Fast}}/F$  was, however, explained rather  
434 differently. Even though the  $\Delta F_{\text{Fast}}/F$  was observed at most of the introduced positions located  
435 in the S3-S4 linker and the top of the S4 segment, it was stated that  $\Delta F_{\text{Fast}}/F$  was not due to a  
436 direct electrochromic effect but instead was associated with rapid voltage-dependent  
437 conformational changes on a  $\mu\text{s}$  time scale (Papp et al., 2019). In the case of hTMEM266, it is  
438 hard to surmise that the fast change detected at many positions is due to electrochromic effect,  
439 because it suggests an unlikely possibility that the electric field is converged at various positions.  
440 Conversely, in the P2X2 receptor, there were only two adjacent positions which exclusively  
441 showed  $\Delta F_{\text{Fast}}/F$  and a linear F-V relationship.

442 In the hTMEM266 study, it was also a concern whether TAMRA-MTS could report an  
443 electrochromic signal, because there was not any previous finding to explain this case. There  
444 was also no report of electrochromic signals recorded using Anap as fluorophore to date. Anap  
445 has only been reported as an environmentally sensitive fluorophore (Lee et al., 2009; Chatterjee  
446 et al., 2013). None reported that Anap is an electrochromic fluorophore, unlike the case of the  
447 modified fluorophore used in *Shaker* Kv studies, which has been reported to have  
448 electrochromic properties (Zhang et al., 1998; Asamoah et al., 2003). On the other hand, studies  
449 on the M<sub>2</sub> muscarinic receptor did not discuss TMRM fluorophore properties, but still  
450 concluded that the observed fast F change with linear F-V originated from the electrochromic  
451 signal (Dekel et al., 2012). Even though other possibilities could still remain, the most  
452 straightforward explanation to interpret the results observed in this study is that the very fast  
453 and linearly voltage-dependent fluorescence changes of Anap at A337 and I341 are associated

454 not with the conformational changes of the P2X2 protein but presumably with the  
455 electrochromic signal. Consequently, the results show that there is an electric field convergence  
456 at these positions which could give us a clue about the possible location of the voltage sensor  
457 in the P2X2 receptor.

458 We observed that  $\Delta F_{\text{Fast}}/F$  changed with voltage in both the closed and ATP bound-open  
459 states, implying the presence of the focused electric field in both states at the position of A337.  
460 The focused electric field was more prominent in the absence of ATP. Some Cys accessibility  
461 studies were performed on the P2X2 receptor in the TM2 domain, to analyze the ATP-evoked  
462 gating mechanism (Li et al., 2008; Kracun et al., 2010; Li et al., 2010). A337 Cys mutants were  
463 first reported to be not modified by MTSET both in the presence or absence of ATP, indicating  
464 that these residues are not involved either in the pore lining region in the open state or in the  
465 gate of P2X2 (Li et al., 2008). Meanwhile in another study using  $\text{Ag}^+$ , a smaller thiol-reactive  
466 ion with higher accessibility, A337C was modified both in the absence and presence of ATP  
467 (Li et al., 2010). These results suggest that a narrow water-phase penetrates down to this  
468 position, which is consistent with the results in this study that there is a focused electric field at  
469 A337.

#### 470 **Detection of slow F change with non-linear voltage-dependence at A337 of K308R mutant**

471 We obtained data supporting voltage-dependent conformational rearrangements  
472 occurring at or around the position of A337, by analyzing the mixed Anap fluorescence signal  
473 changes which contain both  $\Delta F_{\text{Fast}}/F$  and  $\Delta F_{\text{Slow}}/F$  in the presence of an additional mutation of  
474 K308R on top of A337Anap. K308 is located in the ATP binding site and was reported to be  
475 important not only for ATP binding but also for the gating of the P2X2 receptor (Ennion et al.,  
476 2000; Jiang et al., 2000; Roberts et al., 2006; Cao et al., 2007). In VCF analysis, a high  
477 expression level is needed to detect F changes successfully, overcoming the influence of the  
478 background fluorescence. However, high expression makes the P2X2 channel activate even in



479 the absence of ATP and also even at depolarized potentials, i.e. the G-V is shifted to the  
480 depolarized potential, which makes the voltage-dependent activation upon hyperpolarization  
481 unclear. To overcome this problem, we introduced the K308R mutation, which shifts the G-V  
482 relationship in the hyperpolarized direction, with much reduced activity at depolarized  
483 potentials (Keceli & Kubo, 2009). By introducing the K308R mutation, we could observe  
484 voltage-dependent gating better and succeeded in recording the slow and voltage-dependent F  
485 change at A337 (**Fig. 5**).

486 In addition, the  $\Delta F_{\text{Slow}}$  component was observed only at hyperpolarized potentials and  
487 in the presence of ATP (**Fig. 5F – J; Fig. 6**). Also, the  $F_{\text{Slow}} - V$  and G-V overlapped well,  
488 showing that  $\Delta F_{\text{Slow}}$  reflects the hyperpolarization-induced structural rearrangements at or  
489 around the position of A337 (Fig. 5E; Fig. 5J). A337 in TM2 is indeed in the converged electric  
490 field, as shown by the linear  $F - V$  relationship of the  $\Delta F_{\text{Fast}}$  component (**Fig. 5D**), supporting  
491 the notion that the main focus for the voltage-sensing mechanism in the P2X2 receptor lies at  
492 or around A337.

#### 493 **Interaction between A337 in TM2 and F44 in TM1 in the converged electric field**

494 The specific function of each transmembrane domain of the P2X receptor had been  
495 defined before the crystal structure was solved but the information as to the role of each TM in  
496 P2X2 voltage-dependent gating is limited. TM1 is shown to play a role in the binding-gating  
497 process, as mutations in this region alter the agonist selectivity and sensitivity of channel gating  
498 (Haines et al., 2001; Li et al., 2004; Stelmashenko et al., 2014). In contrast, TM2 plays an  
499 essential role in permeation (Nakazawa et al., 1998; Khakh & Egan, 2005) and gating (Li et al.,  
500 2008).

501 Mutations of A337 in the present study suggested that this position is critical for the  
502 complex gating, as mutation to A337F and A337Y altered the channel gating as well as the  
503 activation kinetics upon the application of ATP and voltage (**Fig. 7A – B**). The possible counter-

504 part for A337 is most likely the F44 residue in TM1. Based on the homology modelling of  
505 P2X2, in the ATP-bound open state, F44 rotates and moves towards TM2, specifically into the  
506 proximity of A337 (**Fig. 7C – D**). Mutagenesis at the position of F44 showed the importance  
507 of F44 to maintain the open state in the presence of ATP (**Fig. 7E – F**). The artificial  
508 electrostatic bridge formation experiment of the F44E/A337R mutant (**Fig. 7G – I**) induced  
509 constitutive activity in the absence of ATP and at all recorded voltages, confirming the  
510 importance of the interaction for the maintenance of the activated state, and also showing the  
511 dynamic and presumably voltage-dependent interaction between A337 and F44 in the presence  
512 of ATP. The structural rearrangement at F44 is of very high interest, but F44Anap was not  
513 functional, further showing the critical role of F44.

514         There are several types of voltage-sensing mechanism in membrane proteins (Bezanilla,  
515 2008): (1) charged residues, as in the case of canonical voltage-gated ion channels (Y. Jiang et  
516 al., 2003; Swartz, 2008) (2) side-chains that have an intrinsic dipole moment, such as Tyr, as in  
517 the case of the M<sub>2</sub> muscarinic receptor (Ben-Chaim et al., 2006; Navarro-Polanco et al., 2011;  
518 Dekel et al., 2012; Barchad-Avitzur et al., 2016); (3) the  $\alpha$ -helix, with its intrinsic dipole  
519 moment, and (4) cavities within the protein structure, filled with free ions. Based on our main  
520 findings, the interaction between A337 and F44 in the ATP-bound open state might be under  
521 the influence of the converged electric field (Fig. 8A – C). The findings also clearly demonstrate  
522 that there are voltage-dependent structural rearrangements in the proximity of A337 in TM2.  
523 At this point, the details of how the interaction contributes to the voltage sensing of P2X2  
524 cannot be answered yet. Further structural dynamics analysis at the position of F44 will help to  
525 elucidate the detailed mechanism of the complex gating of the P2X2 receptor.

## 526 **MATERIALS AND METHOD**

### 527 **Ethical approval**

528 All animal experiments were approved by the Animal Care Committee of the National Institutes  
529 of Natural Sciences (NINS, Japan) and performed obeying its guidelines.

530

### 531 **Molecular biology**

532 Wild type (WT) *Rattus norvegicus* P2X2 (*rP2X2*) receptor cDNA (Brake et al., 1994) was  
533 subcloned into the BamHI site of pGEMHE. TAG or any single amino acid mutation and/or  
534 double mutations were introduced using a Quikchange site-directed mutagenesis kit (Agilent  
535 Technologies). The introduced mutations were confirmed by DNA sequencing. mMMESSAGE  
536 T7 RNA transcription kit (Thermo Fisher Scientific) was used to transcribe WT and mutant  
537 *rP2X2* cRNAs from plasmid cDNA linearized by NheI restriction enzyme (Toyobo). The  
538 tRNA-synthetase/Anap-CUA encoding plasmid was obtained from addgene. Salt form of  
539 fUAA Anap was used (Futurechem).

540 *Ciona intestinalis* voltage-sensing phosphatase (*Ci-VSP*) with a mutation in the gating  
541 loop of the phosphatase domain (F401Anap) was used as a positive control (Sakata et al., 2016).  
542 mMMESSAGE SP6 RNA transcription kit (Thermo Fisher Scientific) was used for cRNA  
543 transcription of *Ci-VSP*.

544

### 545 **Preparation of *Xenopus laevis* oocytes**

546 0.15% tricaine (Sigma-Aldrich) was used as an anesthetic reagent for *Xenopus laevis* before  
547 surgical operation for isolation of oocytes. After the final collection, the frogs were humanely  
548 sacrificed by decapitation. Follicular membranes were removed from isolated oocytes by  
549 collagenase treatment (2 mg ml<sup>-1</sup>; type 1; Sigma-Aldrich) for 6.5 hours. Oocytes were then  
550 rinsed and stored in frog Ringer's solution (88 mM NaCl, 1 mM KCl, 2.4 mM NaHCO<sub>3</sub>, 0.3

551 mM Ca(NO<sub>3</sub>)<sub>2</sub>, 0.41 mM CaCl<sub>2</sub>, 0.82 mM Mg<sub>2</sub>SO<sub>4</sub>, and 15 mM HEPES pH 7.6 with NaOH)  
552 containing 0.1% penicillin-streptomycin at 17 °C.

553

### 554 **Channel expression and electrophysiological recording of rP2X2**

555 *Xenopus* oocytes injected with 0.5 ng of WT rP2X2 cRNA and incubated for 2 days at 17 °C  
556 showed a high expression level phenotype of WT rP2X2 that has less voltage dependence than  
557 those of low expression level of P2X2 ( $I < 4.0 \mu\text{A}$  at -60 mV) (Fujiwara & Kubo, 2004). To  
558 achieve low expression level, oocytes were injected with 0.05 ng of WT rP2X2 cRNA and  
559 incubated for 1-2 days. For rP2X2 mutants, oocytes were injected with 0.5 ng – 2.5 ng of cRNA  
560 and incubated for 1-3 days, depending on the desired expression level.

561 Voltage clamp for macroscopic current recording was performed by using an amplifier  
562 (OC-725C; Warner Instruments), a digital-analogue analogue-digital converter (Digidata 1440,  
563 Molecular Devices), and pClamp10.3 software (Molecular Devices). In TEVC recording,  
564 borosilicate glass capillaries (World Precision Instruments) were used with a resistance of 0.2–  
565 0.5 MΩ when filled with 3 M KOAc and 10 mM KCl. P2X2 bath solution contained 95.6 mM  
566 NaCl, 1 mM MgCl<sub>2</sub>, 5 mM HEPES, and 2.4 mM NaOH at pH 7.35 – 7.45. Ca<sup>2+</sup> was not included  
567 in the bath solution in order to avoid the inactivation of the receptor and secondary intracellular  
568 effects, e.g. activation of Ca<sup>2+</sup> dependent chloride channel currents, (Ding & Sachs, 2000).

569 ATP disodium salt (Sigma-Aldrich) was prepared in various concentrations (1 μM, 3  
570 μM, 10 μM, 30 μM, 100 μM, 300 μM, 1 mM, and 3 mM) by dissolving it in the bath solution.  
571 For recording using step-pulse protocols, ATP was applied in two ways, depending on the  
572 purpose of the experiments and the phenotype of the mutants. (1) Direct application using a  
573 motorized pipette (Gilson pipetman) which was set to exchange the whole bath solution with a  
574 ligand-based solution. 2000 μL (five times larger than the bath volume) of ligand-based solution  
575 was applied. (2) Perfusion of a recording chamber using a perfusion system set (ISMATEC

576 pump). In both cases, overflowed bath solution was continuously removed using a suction  
577 pipette by negative air pressure. Oocytes were held at -40 mV and voltage step pulses were  
578 applied in the range from +40 mV to -140 mV. Tail currents were recorded at -60 mV to  
579 measure conductance-voltage (G-V) relationships. Recordings were performed at room  
580 temperature (24±2 °C).

581

### 582 **Expression of Anap incorporated *rP2X2* and *Ci-VSP***

583 For functional expression of channels with incorporated Anap, 1.25 ng of cDNA encoding the  
584 tRNA synthetase/Anap-CUA pair was injected into the nucleus of defolliculated *Xenopus*  
585 oocytes located in the center of the animal pole (Kalstrup & Blunck, 2013). Oocytes were then  
586 incubated for 24 hours at 17 °C to allow tRNA transcription and synthetase expression. The  
587 subsequent step was performed with minimization of light exposure, which otherwise may have  
588 excited the fluorophore. Either 1.4 – 12.6 ng of *rP2X2* cRNA or 8.2 ng of *Ci-VSP* cRNA in  
589 which the target site was mutated to a TAG codon, was co-injected with 23 nL of 1 mM Anap.  
590 Oocytes were incubated in frog Ringer's solution (containing 0.1% penicillin-streptomycin) for  
591 1-3 days (*rP2X2*) or 3-5 days (*Ci-VSP*) depending on the desired expression level. In the  
592 absence of either tRNA synthetase/Anap-CUA plasmid or fUAA Anap, no channel expression  
593 was detected in *rP2X2* Anap mutants, confirming that functional channels are expressed only  
594 when they successfully incorporated fUAA.

595

### 596 **SIK inhibitor application**

597 HG 9-91-01 / SIK inhibitor (MedChem Express) was dissolved in DMSO to make a stock  
598 solution of 10 mM and kept as aliquots at -80 °C. SIK inhibitor was diluted before use with  
599 RNase-free water (Otsuka) into certain concentrations for injection to oocytes. Various  
600 concentrations of SIK inhibitor were injected into oocyte nuclei to determine the most effective

601 concentration to improve the optical recording of VCF-fUAA. SIK inhibitor was mixed and co-  
602 injected with either (1) tRNA synthetase/Anap-CUA plasmid (nuclear injection) or (2) cRNA  
603 + Anap (cytoplasmic injection). 300 nM was defined as the amount of the co-injected SIK  
604 inhibitor in the mixed solution. For instance, the actual concentration of SIK inhibitor is 600  
605 nM for 1:1 mixture with 2.5 ng tRNA synthetase/Anap-CUA plasmid. As the volume of the  
606 oocyte nucleus is ~40 nL, and it can tolerate 15-20 nL of injected volume (Lin-Moshier &  
607 Marchant, 2013), the final concentration of SIK inhibitor inside the oocyte nucleus was ~150  
608 nM.

609 First of all, *Ci-VSP F401Anap* was used to confirm reproducible effects in the initial  
610 optimization experiments. The most effective concentration of SIK inhibitor was determined to  
611 be 300 nM. Next, 300 nM of SIK inhibitor was co-injected to either the nucleus or cytoplasm  
612 of the oocytes, which were then incubated for different periods of time. This resulted in three  
613 test groups: (1) nuclear injection with 2 days incubation; (2) nuclear injection with 3 days  
614 incubation; and (3) cytoplasmic injection with 2 days incubation. Cytoplasmic injection needs  
615 concentration adjustment, since the volume of an oocyte is ~1  $\mu$ L. To make the concentration  
616 inside the oocyte 150 nM, the injected concentration was 3  $\mu$ M. Control groups consisted of  
617 non-treated oocytes, incubated for either 2 or 3 days.

618 A follow-up confirmation experiment was done using the P2X2 A337Anap/R313W  
619 mutant, after the optimum concentration, injection method, and incubation days were  
620 determined from the *Ci-VSP* experiment. 300 nM of SIK inhibitor was co-injected into the  
621 nucleus of the oocyte. Oocytes were then incubated for 2-3 days after subsequent cytoplasmic  
622 co-injection of channel cRNA and Anap.

623

624 **Voltage-clamp fluorometry (VCF) recording**

625 Oocytes for VCF-fUAA recording needed to be shielded from light exposure. Oocytes  
626 were placed in a recording chamber with the animal pole facing upward. For ATP-evoked  
627 current recording, a gap-free protocol was applied, with the holding potential at -80 mV. ATP  
628 was applied by perfusion system as described above. For voltage-evoked current recording,  
629 oocytes were held at +20 mV or at -40 mV in some cases. The step pulses were applied from  
630 +40 mV to -140 mV, +40 mV to -160 mV, or +80 mV to -160 mV.

631 Two recordings (ATP application and voltage application) were performed separately  
632 in different oocytes. Meanwhile, VCF recordings in the absence and presence of ATP using  
633 voltage step pulses, for some mutants (A337Anap, R313F/A337Anap, R313W/A337Anap, and  
634 K308R/A337Anap), were performed in the same oocytes.

635 For voltage step application, ATP was applied directly. As bath volume was measured  
636 to be 600  $\mu$ L, 20  $\mu$ L ATP of 30 times higher concentration was applied directly to the bath  
637 solution. For *Ci*-VSP voltage-clamp recording, cells were clamped at -60 mV and the step  
638 pulses were applied from -80 mV to +160 mV every 3 seconds.

639 The fluorometric recordings were performed with an upright fluorescence microscope  
640 (Olympus BX51WI) equipped with a water immersion objective lens (Olympus XLUMPLAN  
641 FL 20x/1.00) to collect the emission light from the voltage-clamped oocytes. The light from a  
642 xenon arc lamp (L2194-01, Hamamatsu Photonics) was applied through a band-pass excitation  
643 filter (330-360 nm for Anap). In the case of the excitation of Anap to minimize photobleaching  
644 during ATP-application recording, the intensity of the excitation light was decreased to 1.5%  
645 by ND filters (U-25ND6 and U-25ND25 Olympus), whereas, for step-pulses recording, the  
646 intensity of the excitation light was decreased to 6% (U-25ND6 Olympus). Emitted light was  
647 passed through band pass emission filters (Brightline, Semrock) of 420–460 nm and 460–510  
648 nm (Lee et al., 2009; Sakata et al., 2016). The emission signals were detected by two

649 photomultipliers (H10722-110; Hamamatsu Photonics). The detected emission intensities were  
650 acquired by a Digidata 1332 (Axon Instruments) and Clampex 10.3 software (Molecular  
651 Devices) at 10 kHz for ATP application and 20 kHz for voltage application. In the case of *Ci*-  
652 VSP, the detected emission was acquired at 10 kHz. To improve the signal-to-noise ratio, VCF  
653 recording during step-pulse protocols was repeated 20 times for each sample for P2X2 in the  
654 presence of ATP, 5 times in the absence of ATP, and 3 times for *Ci*-VSP. Averaged data were  
655 used for data presentation and analysis.

656

### 657 **Data analysis**

658 Two electrode voltage-clamp data were analyzed using Clampfit 10.5 software  
659 (Molecular Devices) and Igor Pro 5.01 (Wavemetrics). Analyses of conductance-voltage (G-  
660 V) relationship of P2X2 were obtained from tail current recordings at -60 mV and fitted to a  
661 two-state Boltzmann equation using Clampfit:

$$662 \quad I = I_{min} + \frac{I_{max} - I_{min}}{1 + e^{\frac{ZF}{RT}(V - V_{1/2})}} \quad (1)$$

663 where  $I_{min}$  and  $I_{max}$  are defined as the limits of the amplitudes in fittings, Z is defined as the  
664 effective charge,  $V_{1/2}$  is the voltage of half activation, F is Faraday's constant, and T is  
665 temperature in Kelvin.

666 In the case of P2X2, Normalized conductance-voltage (G-V) relationships were plotted using:

$$667 \quad G/G_{max} = I/I_{min} = 1 - (1 + e^{ZF(V - V_{1/2})/RT})^{-1} (1 - I_{max}/I_{min}) \quad (2)$$

668 In the case of voltage-clamp fluorometry data, the gradual decline of fluorescence  
669 recording traces due to photobleaching was compensated by subtracting the expected time-lapse  
670 decrease in bleached component calculated from the trace's bleaching rate (R) by assuming that  
671 the fluorescence is linear. Arithmetic operations were performed by Igor Pro 5.01 for ATP-  
672 evoked fluorescent signals.

$$673 \quad \text{Compensated data} = \text{Recorded F data} + R * \text{point number} \quad (3)$$



674 In the case of fluorescence traces from voltage application for both P2X2 and *Ci*-VSP,  
675 arithmetic operations were performed by Clampfit.

$$676 \quad [\text{Compensated trace}] = [\text{Recorded F trace}] \times (1 - (R \times [\text{time}])) \quad (4)$$

677 Where [time] is the value of the point given by Clampfit. All the compensated traces were then  
678 normalized by setting each baseline (F signal at -40 mV or at +20 mV depending on the holding  
679 potential) level to be 1 to calculate the % F change ( $\Delta F/F$ ;  $\Delta F = F_{-160\text{mV}} - F_{\text{baseline}}$ ;  $F = F_{\text{baseline}}$ ).

680 The fraction of  $\Delta F_{\text{slow}}/F$  was calculated from the equation:

$$681 \quad \Delta F_{\text{steady-state}}/F = \Delta F_{\text{fast}}/F + \Delta F_{\text{slow}}/F \quad ; \quad F = F_{\text{baseline}} \quad (5)$$

682 The data were expressed as mean $\pm$ s.e.m with n indicating the number of samples.

683

## 684 **Statistical Analysis**

685 Statistical analysis was performed by either one-way ANOVA, two-sample t-test, or paired t-  
686 test. Following one-way ANOVA, Tukey's post-hoc test was applied. The data were expressed  
687 as mean  $\pm$  s.e.m with n indicating the number of samples. Values  $p < 0.05$  were defined as  
688 statistically significant. \*, \*\*, \*\*\* denote values of  $p < 0.05$ , 0.01 and 0.001, respectively. All  
689 the statistical analysis and the bar graphs were performed and generated with OriginPro  
690 (OriginLab).

## 691 **Three-dimensional structural modelling of rat P2X2**

692 Homology modelling was performed using a web-based environment for protein structure  
693 homology modelling SWISS-MODEL (Konstantin et al., 2006; Biasini et al., 2014) based upon  
694 sequence alignment of amino acids of *r*P2X2 (NM\_053656) and the crystal structure of *h*P2X3  
695 (Protein Data Bank accession number 5SVJ and 5SVK for closed and ATP-bound open state,  
696 respectively) (Mansoor et al., 2016). All the structural data presented in this study were  
697 generated using PyMOL molecular graphics system ver. 2.3.0 (Schrodinger LLC). Protein  
698 visualization was generated using Protter (Omasits et al., 2014).

699 **ACKNOWLEDGEMENTS**

700 The authors thank Dr. Sakata and Prof. Okamura Y (Osaka University, Graduate School of  
701 Medicine) for the guidance of VCF experiments, all members in Kubo Laboratory for  
702 discussion, Ms. Naito C for technical support, and Dr. Collins A (Saba University, School of  
703 Medicine, Dutch Caribbean) for editing the manuscript.

704 **COMPETING INTERESTS**

705 No competing interests.

706  
707  
708  
709  
710  
711  
712  
713  
714  
715  
716  
717  
718  
719  
720  
721  
722  
723  
724  
725  
726  
727  
728  
729  
730

## REFERENCES

- Asamoah OK, Wuskell JP, Loew LM, Bezanilla F. 2003. A Fluorometric Approach to Local Electric Field Measurements in a Voltage-Gated Ion Channel. *Neuron*, 37(1), 85-98. doi:[https://doi.org/10.1016/S0896-6273\(02\)01126-1](https://doi.org/10.1016/S0896-6273(02)01126-1)
- Barchad-Avitzur O, Priest MF, Dekel N, Bezanilla F, Parnas H, Ben-Chaim Y. 2016. A Novel Voltage Sensor in the Orthosteric Binding Site of the M2 Muscarinic Receptor. *Biophysical Journal*, 111(7), 1396-1408. doi:10.1016/j.bpj.2016.08.035
- Ben-Chaim Y, Chanda B, Dascal N, Bezanilla F, Parnas I, Parnas H. 2006. Movement of ‘gating charge’ is coupled to ligand binding in a G-protein-coupled receptor. *Nature*, 444(7115), 106-109. doi:10.1038/nature05259
- Bezanilla F. 2008. How membrane proteins sense voltage. *Nature Reviews Molecular Cell Biology*, 9, 323. doi:10.1038/nrm2376
- Biasini M, Bienert S, Waterhouse A, Arnold K, Studer G, Schmidt T, Bordoli L, Schwede T. 2014. SWISS MODEL: modelling protein tertiary and quaternary structure using evolutionary information. *Nucleic Acid Research*, 42, 252-258. doi:10.1093/nar/gku340
- Brake AJ, Wagenbach MJ, Julius D. 1994. New structural motif for ligand-gated ion channels defined by an ionotropic ATP receptor. *Nature*, 371(6497), 519-523. doi:10.1038/371519a0
- Bublitz GU, Boxer SG. 1997. STARK SPECTROSCOPY: Applications in Chemistry, Biology, and Materials Science. *Annual Review of Physical Chemistry*, 48(1), 213-242. doi:10.1146/annurev.physchem.48.1.213
- Burnstock G. (2003). Introduction: ATP and Its Metabolites as Potent Extracellular Agents *Current Topics in Membranes* (Vol. 54, pp. 1-27): Academic Press.
- Cao L, Broomhead HE, Young MT, North RA. 2009. Polar residues in the second transmembrane domain of the rat P2X2 receptor that affect spontaneous gating, unitary

- 731 conductance, and rectification. *J Neurosci*, 29(45), 14257-14264.  
732 doi:10.1523/JNEUROSCI.4403-09.2009
- 733 Cao L, Young MT, Broomhead HE, Fountain SJ, North RA. 2007. Thr339-to-serine  
734 substitution in rat P2X2 receptor second transmembrane domain causes constitutive  
735 opening and indicates a gating role for Lys308. *J Neurosci*, 27(47), 12916-12923.  
736 doi:10.1523/JNEUROSCI.4036-07.2007
- 737 Cha A, Bezanilla F. 1997. Characterizing Voltage-Dependent Conformational Changes in the  
738 ShakerK<sup>+</sup> Channel with Fluorescence. *Neuron*, 19(5), 1127-1140.  
739 doi:[https://doi.org/10.1016/S0896-6273\(00\)80403-1](https://doi.org/10.1016/S0896-6273(00)80403-1)
- 740 Chatterjee A, Guo J, Lee HS, Schultz PG. 2013. A genetically encoded fluorescent probe in  
741 mammalian cells. *J Am Chem Soc*, 135(34), 12540-12543. doi:10.1021/ja4059553
- 742 Dekel N, Priest MF, Parnas H, Parnas I, Bezanilla F. 2012. Depolarization induces a  
743 conformational change in the binding site region of the M2 muscarinic receptor. *Proc*  
744 *Natl Acad Sci U S A*, 109(1), 285-290. doi:10.1073/pnas.1119424109
- 745 Ding S, Sachs F. 2000. Inactivation of P2X2 purinoceptors by divalent cations. *J Physiol*, 522  
746 Pt 2(Pt 2), 199-214. doi:10.1111/j.1469-7793.2000.t01-1-00199.x
- 747 Ennion S, Hagan S, Evans RJ. 2000. The role of positively charged amino acids in ATP  
748 recognition by human P2X(1) receptors. *J Biol Chem*, 275(38), 29361-29367.  
749 doi:10.1074/jbc.M003637200
- 750 Fujiwara Y, Keceli B, Nakajo K, Kubo Y. 2009. Voltage- and [ATP]-dependent gating of the  
751 P2X(2) ATP receptor channel. *J Gen Physiol*, 133(1), 93-109.  
752 doi:10.1085/jgp.200810002
- 753 Fujiwara Y, Kubo Y. 2004. Density-dependent changes of the pore properties of the P2X2  
754 receptor channel. *J Physiol*, 558(Pt 1), 31-43. doi:10.1113/jphysiol.2004.064568

- 755 Habermacher C, Martz A, Calimet N, Lemoine D, Peverini L, Specht A, Cecchini M, Grutter  
756 T. 2016. Photo-switchable tweezers illuminate pore-opening motions of an ATP-gated  
757 P2X ion channel. *Elife*, 5, e11050. doi:10.7554/eLife.11050
- 758 Haines WR, Migita K, Cox JA, Egan TM, Voigt MM. 2001. The first transmembrane domain  
759 of the P2X receptor subunit participates in the agonist-induced gating of the channel. *J*  
760 *Biol Chem*, 276(35), 32793-32798. doi:10.1074/jbc.M104216200
- 761 Hattori M, Gouaux E. 2012. Molecular mechanism of ATP binding and ion channel activation  
762 in P2X receptors. *Nature*, 485(7397), 207-212. doi:10.1038/nature11010
- 763 Heymann G, Dai J, Li M, Silberberg SD, Zhou HX, Swartz KJ. 2013. Inter- and intrasubunit  
764 interactions between transmembrane helices in the open state of P2X receptor channels.  
765 *Proc Natl Acad Sci U S A*, 110(42), E4045-4054. doi:10.1073/pnas.1311071110
- 766 Housley GD, Morton-Jones R, Vlajkovic SM, Telang RS, Paramanathasivam V, Tadros SF,  
767 Wong ACY, Froud KE, Cederholm JME, Sivakumaran Y, Snguanwongchai P, Khakh  
768 BS, Cockayne DA, Thorne PR, Ryan AF. 2013. ATP-gated ion channels mediate  
769 adaptation to elevated sound levels. *Proc Natl Acad Sci U S A*, 110(18), 7494-7499.  
770 doi:10.1073/pnas.1222295110
- 771 Jiang L-H, Kim M, Spelta V, Bo X, Surprenant A, North RA. 2003. Subunit Arrangement in  
772 P2X Receptors. *The Journal of Neuroscience*, 23(26), 8903.  
773 doi:10.1523/JNEUROSCI.23-26-08903.2003
- 774 Jiang LH, Rassendren F, Spelta V, Surprenant A, North RA. 2001. Amino acid residues  
775 involved in gating identified in the first membrane-spanning domain of the rat P2X(2)  
776 receptor. *J Biol Chem*, 276(18), 14902-14908. doi:10.1074/jbc.M011327200
- 777 Jiang LH, Rassendren F, Surprenant A, North RA. 2000. Identification of amino acid residues  
778 contributing to the ATP-binding site of a purinergic P2X receptor. *J Biol Chem*, 275(44),  
779 34190-34196. doi:10.1074/jbc.M005481200

- 780 Jiang Y, Lee A, Chen J, Ruta V, Cadene M, Chait BT, MacKinnon R. 2003. X-ray structure of  
781 a voltage-dependent K<sup>+</sup> channel. *Nature*, 423(6935), 33-41. doi:10.1038/nature01580
- 782 Kalstrup T, Blunck R. 2013. Dynamics of internal pore opening in K<sup>V</sup> channels  
783 probed by a fluorescent unnatural amino acid. *Proc Natl Acad Sci U S A*, 110(20), 8272-  
784 8277. doi:10.1073/pnas.1220398110
- 785 Kalstrup T, Blunck R. 2018. S4-S5 linker movement during activation and inactivation in  
786 voltage-gated K(+) channels. *Proc Natl Acad Sci U S A*, 115(29), E6751-E6759.  
787 doi:10.1073/pnas.1719105115
- 788 Kawate T, Michel JC, Birdsong WT, Gouaux E. 2009. Crystal structure of the ATP-gated  
789 P2X(4) ion channel in the closed state. *Nature*, 460(7255), 592-598.  
790 doi:10.1038/nature08198
- 791 Keceli B, Kubo Y. 2009. Functional and structural identification of amino acid residues of the  
792 P2X2 receptor channel critical for the voltage- and [ATP]-dependent gating. *J Physiol*,  
793 587(Pt 24), 5801-5818. doi:10.1113/jphysiol.2009.182824
- 794 Keceli B, Kubo Y. 2014. Signal transmission within the P2X2 trimeric receptor. *J Gen Physiol*,  
795 143(6), 761-782. doi:10.1085/jgp.201411166
- 796 Khakh BS, Egan TM. 2005. Contribution of transmembrane regions to ATP-gated P2X2  
797 channel permeability dynamics. *J Biol Chem*, 280(7), 6118-6129.  
798 doi:10.1074/jbc.M411324200
- 799 Klippenstein V, Mony L, Paoletti P. 2018. Probing Ion Channel Structure and Function Using  
800 Light-Sensitive Amino Acids. *Trends Biochem Sci*, 43(6), 436-451.  
801 doi:10.1016/j.tibs.2018.02.012
- 802 Klymchenko AS, Demchenko AP. 2002. Electrochromic Modulation of Excited-State  
803 Intramolecular Proton Transfer: The New Principle in Design of Fluorescence Sensors.

- 804 *Journal of the American Chemical Society*, 124(41), 12372-12379.  
805 doi:10.1021/ja027669l
- 806 Klymchenko AS, Stoeckel H, Takeda K, Mély Y. 2006. Fluorescent Probe Based on  
807 Intramolecular Proton Transfer for Fast Ratiometric Measurement of Cellular  
808 Transmembrane Potential. *The Journal of Physical Chemistry B*, 110(27), 13624-13632.  
809 doi:10.1021/jp062385z
- 810 Konstantin A, Lorenza B, Kopp J, Torsten S. 2006. The SWISS Model workspace: a web-based  
811 environment for protein structure homology modelling. *Bioinformatics*, 22, 195-201.
- 812 Kracun S, Chaptal V, Abramson J, Khakh BS. 2010. Gated access to the pore of a P2X receptor:  
813 structural implications for closed-open transitions. *J Biol Chem*, 285(13), 10110-10121.  
814 doi:10.1074/jbc.M109.089185
- 815 Lee EEL, Bezanilla F. 2019. Methodological improvements for fluorescence recordings in  
816 *Xenopus laevis* oocytes. *J Gen Physiol*, 151(2), 264-272. doi:10.1085/jgp.201812189
- 817 Lee HS, Guo J, Lemke EA, Dimla RD, Schultz PG. 2009. Genetic incorporation of a small,  
818 environmentally sensitive, fluorescent probe into proteins in *Saccharomyces cerevisiae*.  
819 *J Am Chem Soc*, 131(36), 12921-12923. doi:10.1021/ja904896s
- 820 Li M, Chang TH, Silberberg SD, Swartz KJ. 2008. Gating the pore of P2X receptor channels.  
821 *Nat Neurosci*, 11(8), 883-887. doi:10.1038/nn.2151
- 822 Li M, Kawate T, Silberberg SD, Swartz KJ. 2010. Pore-opening mechanism in trimeric P2X  
823 receptor channels. *Nat Commun*, 1, 44. doi:10.1038/ncomms1048
- 824 Li Z, Migita K, Samways DSK, Voigt MM, Egan TM. 2004. Gain and Loss of Channel  
825 Function by Alanine Substitutions in the Transmembrane Segments of the Rat ATP-  
826 Gated P2X2 Receptor. *The Journal of Neuroscience*, 24(33), 7378-7386.  
827 doi:10.1523/jneurosci.1423-04.2004

- 828 Lin-Moshier Y, Marchant JS. 2013. Nuclear microinjection to assess how heterologously  
829 expressed proteins impact Ca<sup>2+</sup> signals in *Xenopus* oocytes. *Cold Spring Harb Protoc*,  
830 2013(3). doi:10.1101/pdb.prot072785
- 831 Loew LM. 1982. Design and characterization of electrochromic membrane probes. *Journal of*  
832 *Biochemical and Biophysical Methods*, 6(3), 243-260.  
833 doi:[https://doi.org/10.1016/0165-022X\(82\)90047-1](https://doi.org/10.1016/0165-022X(82)90047-1)
- 834 Mannuzzu LM, Moronne MM, Isacoff EY. 1996. Direct Physical Measure of Conformational  
835 Rearrangement Underlying Potassium Channel Gating. *Science*, 271(5246), 213-216.  
836 doi:10.1126/science.271.5246.213
- 837 Mansoor SE, Lu W, Oosterheert W, Shekhar M, Tajkhorshid E, Gouaux E. 2016. X-ray  
838 structures define human P2X(3) receptor gating cycle and antagonist action. *Nature*,  
839 538(7623), 66-71. doi:10.1038/nature19367
- 840 McCarthy AE, Yoshioka C, Mansoor SE. 2019. Full-Length P2X7 Structures Reveal How  
841 Palmitoylation Prevents Channel Desensitization. *Cell*, 179(3), 659-670.e613.  
842 doi:<https://doi.org/10.1016/j.cell.2019.09.017>
- 843 Mujahid N, Liang Y, Murakami R, Choi HG, Dobry AS, Wang J, Suita Y, Weng QY, Allouche  
844 J, Kemeny LV, Hermann AL, Roeder EM, Gray NS, Fisher DE. 2017. A UV-  
845 Independent Topical Small-Molecule Approach for Melanin Production in Human Skin.  
846 *Cell Reports*, 19(11), 2177-2184. doi:<https://doi.org/10.1016/j.celrep.2017.05.042>
- 847 Nakajo K, Kubo Y. 2014. Steric hindrance between S4 and S5 of the KCNQ1/KCNE1 channel  
848 hampers pore opening. *Nat Commun*, 5, 4100. doi:10.1038/ncomms5100
- 849 Nakazawa K, Inoue K, Ohno Y. 1998. An asparagine residue regulating conductance through  
850 P2X2 receptor/channels. *European Journal of Pharmacology*, 347(1), 141-144.  
851 doi:[https://doi.org/10.1016/S0014-2999\(98\)00207-6](https://doi.org/10.1016/S0014-2999(98)00207-6)



- 852 Nakazawa K, Liu M, Inoue K, Ohno Y. 1997. Voltage-Dependent Gating of ATP-Activated  
853 Channels in PC12 Cells. *Journal of Neurophysiology*, 78(2), 884-890.  
854 doi:10.1152/jn.1997.78.2.884
- 855 Nakazawa K, Ohno Y. 2005. Characterization of voltage-dependent gating of P2X2  
856 receptor/channel. *European Journal of Pharmacology*, 508(1), 23-30.  
857 doi:<https://doi.org/10.1016/j.ejphar.2004.12.005>
- 858 Navarro-Polanco RA, Moreno Galindo EG, Ferrer-Villada T, Arias M, Rigby JR, Sanchez-  
859 Chapula JA, Tristani-Firouzi M. 2011. Conformational changes in the M2 muscarinic  
860 receptor induced by membrane voltage and agonist binding. *J Physiol*, 589(Pt 7), 1741-  
861 1753. doi:10.1113/jphysiol.2010.204107
- 862 North RA. 2002. Molecular Physiology of P2X Receptors. *Physiological Reviews*, 82(4), 1013-  
863 1067. doi:10.1152/physrev.00015.2002
- 864 Omasits U, Ahrens CH, Müller S, Wollscheid B. 2014. Protter: interactive protein feature  
865 visualization and integration with experimental proteomic data. *Bioinformatics*(15  
866 March 2014), 884-886. doi:10.1093/bioinformatics/btt607.
- 867 Papp F, Lomash S, Szilagyi O, Babikow E, Smith J, Chang TH, Bahamonde MI, Toombes GES,  
868 Swartz KJ. 2019. TMEM266 is a functional voltage sensor regulated by extracellular  
869 Zn(2). *Elife*, 8. doi:10.7554/eLife.42372
- 870 Pless SA, Lynch JW. 2008. Illuminating the Structure and Function of Cys-Loop Receptors.  
871 *Clinical and Experimental Pharmacology and Physiology*, 35(10), 1137-1142.  
872 doi:10.1111/j.1440-1681.2008.04954.x
- 873 Radford KM, Virginio C, Surprenant A, North RA, Kawashima E. 1997. Baculovirus  
874 Expression Provides Direct Evidence for Heteromeric Assembly of P2X2 and P2X3  
875 Receptors. *The Journal of Neuroscience*, 17(17), 6529. doi:10.1523/JNEUROSCI.17-  
876 17-06529.1997

- 877 Roberts JA, Vial C, Digby HR, Agboh KC, Wen H, Atterbury-Thomas A, Evans RJ. 2006.  
878 Molecular properties of P2X receptors. *Pflugers Arch*, 452(5), 486-500.  
879 doi:10.1007/s00424-006-0073-6
- 880 Sakata S, Jinno Y, Kawanabe A, Okamura Y. 2016. Voltage-dependent motion of the catalytic  
881 region of voltage-sensing phosphatase monitored by a fluorescent amino acid. *Proc Natl*  
882 *Acad Sci U S A*, 113(27), 7521-7526. doi:10.1073/pnas.1604218113
- 883 Samways DS, Migita K, Li Z, Egan TM. 2008. On the role of the first transmembrane domain  
884 in cation permeability and flux of the ATP-gated P2X2 receptor. *J Biol Chem*, 283(8),  
885 5110-5117. doi:10.1074/jbc.M708713200
- 886 Schewe M, Nematian-Ardestani E, Sun H, Musinszki M, Cordeiro S, Bucci G, de Groot BL,  
887 Tucker SJ, Rapedius M, Baukrowitz T. 2016. A Non-canonical Voltage-Sensing  
888 Mechanism Controls Gating in K2P K(+) Channels. *Cell*, 164(5), 937-949.  
889 doi:10.1016/j.cell.2016.02.002
- 890 Stelmashenko O, Compan V, Browne LE, North RA. 2014. Ectodomain movements of an ATP-  
891 gated ion channel (P2X2 receptor) probed by disulfide locking. *J Biol Chem*, 289(14),  
892 9909-9917. doi:10.1074/jbc.M113.542811
- 893 Swartz KJ. 2008. Sensing voltage across lipid membranes. *Nature*, 456, 891.  
894 doi:10.1038/nature07620
- 895 Talwar S, Lynch JW. 2015. Investigating ion channel conformational changes using voltage  
896 clamp fluorometry. *Neuropharmacology*, 98, 3-12.  
897 doi:10.1016/j.neuropharm.2015.03.018
- 898 Valera S, Hussy N, Evans RJ, Adami N, North RA, Surprenant A, Buell G. 1994. A new class  
899 of ligand-gated ion channel defined by P2X receptor for extracellular ATP. *Nature*,  
900 371(6497), 516-519. doi:10.1038/371516a0

- 901 Yan D, Zhu Y, Walsh T, Xie D, Yuan H, Sirmaci A, Fujikawa T, Wong ACY, Loh TL, Du L,  
902 Grati Mh, Vlajkovic SM, Blanton S, Ryan AF, Chen Z-Y, Thorne PR, Kachar B, Tekin  
903 M, Zhao H-B, Housley GD, King M-C, Liu XZ. 2013. Mutation of the ATP-gated P2X2  
904 receptor leads to progressive hearing loss and increased susceptibility to noise. *Proc*  
905 *Natl Acad Sci U S A*, 110(6), 2228-2233. doi:10.1073/pnas.1222285110
- 906 Zhang J, Davidson RM, Wei M-d, Loew LM. 1998. Membrane Electric Properties by  
907 Combined Patch Clamp and Fluorescence Ratio Imaging in Single Neurons.  
908 *Biophysical Journal*, 74(1), 48-53. doi:[https://doi.org/10.1016/S0006-3495\(98\)77765-](https://doi.org/10.1016/S0006-3495(98)77765-3)  
909 [3](https://doi.org/10.1016/S0006-3495(98)77765-3)
- 910 Zhou Z, Hume RI. 1998. Two mechanisms for inward rectification of current flow through the  
911 purinoceptor P2X2 class of ATP-gated channels. *J Physiol*, 507 ( Pt 2), 353-364.  
912 doi:10.1111/j.1469-7793.1998.353bt.x

**Supplementary Table 1**

| No. | Domain                                              | TAG mutation position | Fluorescence (F) change |                         | Current (I) change  |                         |   |
|-----|-----------------------------------------------------|-----------------------|-------------------------|-------------------------|---------------------|-------------------------|---|
|     |                                                     |                       | ATP-evoked F change     | Voltage-evoked F change | ATP-evoked I change | Voltage-evoked I change |   |
| 1   | Extracellular Domain (ECD), around ATP-binding site | D209                  | +                       | -                       | +                   | +                       |   |
| 2   |                                                     | A283                  | +                       | -                       | +                   | +                       |   |
| 3   |                                                     | S284                  | -                       | -                       | -                   | -                       |   |
| 4   |                                                     | S285                  | n.d.                    | -                       | +                   | +                       |   |
| 5   |                                                     | G286                  | n.d.                    | -                       | +                   | +                       |   |
| 6   | ECD, in extracellular linker                        | K53                   | +                       | -                       | +                   | +                       |   |
| 7   |                                                     | S54                   | +                       | -                       | +                   | +                       |   |
| 8   |                                                     | Y55 (**)              | n.d.                    | -                       | +                   | +                       |   |
| 9   |                                                     | S58                   | +                       | -                       | +                   | +                       |   |
| 10  |                                                     | E63                   | -                       | -                       | +                   | +                       |   |
| 11  |                                                     | S65                   | -                       | -                       | -                   | -                       |   |
| 12  |                                                     | I67                   | -                       | -                       | +                   | +                       |   |
| 13  |                                                     | E91                   | n.d.                    | -                       | +                   | +                       |   |
| 14  |                                                     | T105                  | n.d.                    | -                       | +                   | +                       |   |
| 15  |                                                     | E167                  | n.d.                    | -                       | +                   | +                       |   |
| 16  |                                                     | R304                  | n.d.                    | -                       | +                   | +                       |   |
| 17  |                                                     | A309                  | n.d.                    | -                       | +                   | +                       |   |
| 18  |                                                     | R313                  | -                       | -                       | +                   | +                       |   |
| 19  |                                                     | I314                  | n.d.                    | -                       | +                   | +                       |   |
| 20  |                                                     | D315                  | +                       | -                       | +                   | +                       |   |
| 21  |                                                     | V316                  | -                       | -                       | -                   | -                       |   |
| 22  |                                                     | I317                  | -                       | -                       | +                   | +                       |   |
| 23  |                                                     | V318                  | -                       | -                       | -                   | -                       |   |
| 24  |                                                     | H319                  | -                       | -                       | +                   | +                       |   |
| 25  |                                                     | A322                  | n.d.                    | -                       | +                   | +                       |   |
| 26  |                                                     | K324                  | -                       | -                       | +                   | +                       |   |
| 27  |                                                     | F325                  | +                       | -                       | +                   | +                       |   |
| 28  |                                                     | Transmembrane 2       | S326                    | +                       | -                   | +                       | + |
| 29  |                                                     |                       | L327                    | -                       | -                   | +                       | + |
| 30  |                                                     |                       | I328                    | -                       | -                   | +                       | - |
| 31  |                                                     |                       | P329                    | -                       | -                   | +                       | + |
| 32  |                                                     |                       | T330                    | -                       | -                   | +                       | - |
| 33  | I331                                                |                       | +                       | -                       | +                   | +                       |   |
| 34  | I332                                                |                       | +                       | -                       | +                   | +                       |   |
| 35  | N333                                                |                       | -                       | -                       | +                   | +                       |   |
| 36  | L334                                                |                       | -                       | -                       | +                   | +                       |   |
| 37  | A335                                                |                       | +                       | -                       | +                   | +                       |   |
| 38  | T336                                                |                       | -                       | -                       | -                   | -                       |   |
| 39  | A337                                                |                       | +                       | +                       | +                   | +                       |   |
| 40  | L338                                                |                       | -                       | -                       | +                   | +                       |   |
| 41  | T339                                                |                       | -                       | -                       | +                   | -                       |   |
| 42  | S340 (**)                                           |                       | n.d.                    | n.d.                    | n.d.                | n.d.                    |   |
| 43  | I341                                                |                       | +                       | +                       | +                   | +                       |   |
| 44  | G342 (**)                                           |                       | n.d.                    | n.d.                    | n.d.                | n.d.                    |   |
| 45  | V343                                                |                       | +                       | -                       | +                   | +                       |   |
| 46  | G344                                                |                       | -                       | -                       | +* (1mM)            | +* (1mM)                |   |
| 47  | S345                                                |                       | -                       | -                       | +                   | +                       |   |
| 48  | F346                                                |                       | +                       | -                       | +                   | +                       |   |
| 49  | L347                                                | -                     | -                       | +                       | +                   |                         |   |

| No. | Domain                   | TAG mutation position    | Fluorescence (F) change |                         | Current (I) change  |                         |   |
|-----|--------------------------|--------------------------|-------------------------|-------------------------|---------------------|-------------------------|---|
|     |                          |                          | ATP-evoked F change     | Voltage-evoked F change | ATP-evoked I change | Voltage-evoked I change |   |
| 50  | Transmembrane 2          | C348                     | -                       | -                       | -                   | -                       |   |
| 51  |                          | D349                     | -                       | -                       | -                   | -                       |   |
| 52  | Transmembrane 1          | R34                      | n.d.                    | -                       | +                   | +                       |   |
| 53  |                          | M35                      | +                       | -                       | +                   | +                       |   |
| 54  |                          | V36                      | +                       | -                       | +                   | +                       |   |
| 55  |                          | Q37                      | +                       | -                       | +                   | +                       |   |
| 56  |                          | L38                      | n.d.                    | -                       | +                   | +                       |   |
| 57  |                          | L39                      | n.d.                    | -                       | +                   | +                       |   |
| 58  |                          | I40                      | n.d.                    | -                       | +                   | +                       |   |
| 59  |                          | L41                      | n.d.                    | -                       | +                   | +                       |   |
| 60  |                          | L42                      | n.d.                    | -                       | +                   | +                       |   |
| 61  |                          | Y43                      | +                       | -                       | +                   | -                       |   |
| 62  |                          | F44                      | -                       | -                       | -                   | -                       |   |
| 63  |                          | V45                      | +                       | -                       | +                   | +                       |   |
| 64  |                          | W46                      | +                       | -                       | +                   | +                       |   |
| 65  |                          | Y47                      | +                       | -                       | +                   | -                       |   |
| 66  |                          | V48                      | -                       | -                       | -                   | -                       |   |
| 67  |                          | F49                      | +                       | -                       | +                   | +                       |   |
| 68  |                          | I50                      | +                       | -                       | +                   | +                       |   |
| 69  |                          | V51                      | +                       | -                       | +                   | +                       |   |
| 70  |                          | Q52                      | -                       | -                       | +                   | +                       |   |
| 71  |                          | Intracellular C terminal | W350                    | -                       | -                   | -                       | - |
| 72  | I351                     |                          | -                       | -                       | +(3mM)              | +(3mM)                  |   |
| 73  | F355                     |                          | -                       | -                       | +                   | +                       |   |
| 74  | M356                     |                          | -                       | n.d.                    | +(***)              | n.d.                    |   |
| 75  | N357                     |                          | -                       | -                       | -                   | -                       |   |
| 76  | K358                     |                          | -                       | n.d.                    | +(***)              | n.d.                    |   |
| 77  | N359                     |                          | -                       | -                       | +                   | +                       |   |
| 78  | L361                     |                          | -                       | -                       | +                   | +                       |   |
| 79  | Y362                     |                          | -                       | n.d.                    | +(***)              | n.d.                    |   |
| 80  | S363                     |                          | -                       | n.d.                    | +(***)              | n.d.                    |   |
| 81  | H364                     |                          | -                       | -                       | +                   | +                       |   |
| 82  | F367                     |                          | n.d.                    | n.d.                    | n.d.                | n.d.                    |   |
| 83  | D368                     |                          | -                       | -                       | -                   | -                       |   |
| 84  | V370                     |                          | -                       | n.d.                    | +(***)              | n.d.                    |   |
| 85  | R371                     |                          | +                       | -                       | +                   | +                       |   |
| 86  | T372                     |                          | -                       | -                       | +                   | +                       |   |
| 87  | P373                     |                          | +                       | -                       | +                   | +                       |   |
| 88  | K374                     |                          | +                       | -                       | +                   | +                       |   |
| 89  | Intracellular N terminal |                          | Y16                     | -                       | -                   | -                       | - |
| 90  |                          |                          | E17                     | -                       | -                   | -                       | - |
| 91  |                          | T18                      | -                       | -                       | -                   | -                       |   |
| 92  |                          | P19                      | -                       | -                       | -                   | -                       |   |
| 93  |                          | K20                      | -                       | -                       | -                   | -                       |   |
| 94  |                          | V24                      | -                       | n.d.                    | +(***)              | n.d.                    |   |
| 95  |                          | N26                      | -                       | n.d.                    | +(***)              | +                       |   |
| 96  |                          | V32                      | -                       | -                       | +                   | +                       |   |

**Supplementary Table 1. List of introduced TAG mutations in P2X2 receptor for VCF analyses**

Mutations were introduced one at a time in 96 positions within the extracellular domain (ECD) near the ATP-binding site and extracellular linker, transmembrane domains (TMs), intracellular N-terminal, and intracellular C-terminal. ATP application ranging from 10  $\mu$ M, 30  $\mu$ M, or 100  $\mu$ M unless otherwise stated. (+) indicates there was either ATP-evoked fluorescence (F) signal change, voltage-evoked F change, ATP-evoked current (I) change, or voltage-evoked I change. (-) indicates negative result. (\*\*) indicates mutants which have a very low expression level so that the VCF analyses could not be performed. (\*\*\*) indicates fast current decay. n.d. indicates not determined.
